1 **Title:**

2 **The ventral disc is a flexible microtubule organelle that depends on domed ultrastructure for**  
3 **functional attachment of *Giardia lamblia***

4

5

6 Christopher Nosala and Scott C. Dawson

7

8 Department of Microbiology and Molecular Genetics

9 One Shields Avenue

10 UC Davis

11 Davis, CA 95616

12

13 Corresponding author

14 [scdawson@ucdavis.edu](mailto:scdawson@ucdavis.edu)

15

16

17 **Keywords:** *Giardia*, parasite, ventral disc, microtubule organelle.

18

19 **Abstract**

20 The parasite *Giardia lamblia* interacts with its host by directly attaching the lumen of the small  
21 intestine. Attachment is mediated by a cytoskeletal structure termed the ventral disc and  
22 proceeds in four distinct stages: skimming, seal formation, cell body contacts, and bare area  
23 contacts. The precise mechanism of disc-mediated attachment is unclear and attachment  
24 models rely heavily on whether or not the ventral disc is a dynamic structure. We sought to  
25 investigate the second stage of attachment in which a seal is formed beneath the ventral disc.  
26 Three-dimensional, live imaging of *Giardia* expressing specific ventral disc markers to the lateral  
27 crest, ventral groove, and disc body indicate dynamic movement in all of these regions. We  
28 observe seal formation by the lateral crest and determine that movement of the ventral groove  
29 region aids lateral crest seal formation. We also report the discovery of a new protein that is  
30 necessary for ventral disc formation and functional attachment (DAP\_7268). Lastly, we  
31 observed that attachment largely depends on ventral disc ultrastructure as flattened discs  
32 display hindered attachment proficiency whether or not they retain the ability to form a seal.  
33 We propose a synthesized mechanism for attachment that includes flagellar hydrodynamic flow  
34 to help generate suction as well as disc conformational dynamics to aid in both hydrodynamic  
35 flow and the maintenance of negative pressure.

36

37 **Introduction**

38 *Giardia lamblia* is a zoonotic intestinal parasite that causes significant diarrheal disease  
39 worldwide (1). *Giardiasis* disproportionately impacts people in developing countries where  
40 early and recurrent childhood infection is associated with worsened malnutrition and delayed  
41 development. Trophozoites are the motile flagellated form of the parasite that readily attach  
42 to the lumen of the small intestine. During colonization, *Giardia* forms a monolayer but does  
43 not invade cells nor tissues. The trophozoite's interphase cytoskeleton comprises many  
44 microtubule structures including the ventral disc, four pairs of bisymmetrical flagella, the  
45 median body, and the funis (2). The ventral disc mediates attachment within the host gut and  
46 is essential for *in vivo* colonization because unattached trophozoites are swept away via  
47 peristalsis and shed in the feces where they cannot survive harsh environmental conditions (3).  
48 Recent studies indicate that *Giardia* can attach to a variety of surfaces regardless of surface  
49 treatment (PEG, Teflon) (4). This indifference to surface chemistry may help explain *Giardia's*  
50 zoonotic potential by allowing the parasite to attach to a variety of mammalian intestinal  
51 environments despite varying luminal chemistry. It remains unclear exactly how *Giardia*  
52 performs attachment, yet this mechanism allows quick reversible adherence to almost any  
53 surface.

54

55 The foundation of the ventral disc is a parallel array of microtubules ~100 polymers thick  
56 (Figure 1A). Built on these microtubules are distinct substructures including outer microtubule  
57 associated proteins, inner microtubule associated proteins, microribbons, and crossbridges (5).

58 Although both outer and inner MAPs are discernible via cryo-ET, the identity of these MAPs  
59 remains unknown (6, 7). The microribbons are trilaminar sheets of protein that jet dorsally into  
60 the cell body from the microtubules. Crossbridges join the microribbons laterally with regular  
61 spacing. These ventral disc substructures are found throughout the entirety of the ventral disc  
62 yet the role they play in forming ventral disc ultrastructure and functional attachment, as well  
63 as the protein makeup of each substructure, is largely unknown. Eighty five proteins localize to  
64 the ventral disc (5). How these proteins are involved in building and maintaining the ventral  
65 disc structure is unclear. Many GFP localizations correlate with differential protein densities  
66 described using cryo-tomography (6, 7). These observations indicate the ventral disc can be  
67 separated into distinct regions: disc body, overlap zone, ventral groove, disc margin, and the  
68 lateral crest (Figure 1A).

69

70 Ventral disc mediated suction is the prevailing attachment model because *Giardia* can attach  
71 regardless of surface chemical treatment, because attachment is rapidly reversible, and  
72 because trophozoites prefer flat to bumpy surfaces (anything else?). Suction would require a  
73 means of generating negative pressure beneath the domed shape of the disk as well as the  
74 formation and maintenance of a seal. TIRF microscopy has been used to view *Giardia's*  
75 membrane interaction with the attachment surface and *Giardia* was observed to progress  
76 through four distinct stages of attachment (Figure 1C) (8). These attachment stages proceed in  
77 reverse during detachment. Early in attachment, trophozoites encounter the attachment plane  
78 and cells orient ventral disc side down. Parasites then skim along the surface with  
79 membrane/surface contact at the anterior portion of the ventrolateral flange. The cell

80 membrane is observed to form a seal when a suitable habitation site is encountered. This seal  
81 progresses from the anterior part of the cell to surround the entire ventral disc area with the  
82 portion near the ventral groove contacting the surface last. There remains many unanswered  
83 questions regarding this stage of attachment. Is the ventral disc an active player in seal  
84 formation? Is seal formation necessary for attachment? Why is the ventral groove region the  
85 last to contact the surface? What can specific ventral disc regions teach us about *Giardia's*  
86 attachment mechanism?

87

88 We sought to investigate the second stage of attachment in which the membrane forms a  
89 contiguous seal beneath the ventral disc. Prior descriptions of ventral disc function rely heavily  
90 on static images of fixed cells (EM) or indirect observations of membrane dynamics (5). We  
91 used a variety of live imaging strategies with *Giardia* expressing specific ventral disc markers to  
92 clarify a long standing controversy regarding ventral disc conformational changes. We observe  
93 seal formation by the lateral crest as well as dynamic movement of the ventral groove region *in*  
94 *vivo*. Here we report the discovery of a new protein that is necessary for ventral disc formation  
95 and functional attachment (DAP\_7268). Lastly, we observed that attachment largely depends  
96 on ventral disc ultrastructure as flattened discs display hindered attachment proficiency  
97 whether or not they retain the ability to form a seal.

98

## 99 **Results**

100 Flagella are important for establishing but not maintaining attachment

101 We developed a novel shear stress assay using a commercial flow chamber (Ibidi mSlide VI 0.4)  
102 to quantify *Giardia* attachment forces (Figure 2A, movies Supplemental 1). In this assay we  
103 used the 86676-gfp strain because the fluorescent ventral disc signal allowed for rapid  
104 quantification of cell number before and after shear force was applied. 86676-gfp cells were  
105 challenged using a variety of forces and it was found that 90% of these cells were able to resist  
106 2ml/min of flow (~4dyn/cm<sup>2</sup>).

107

108 Using two genetic techniques to disrupt normal flagellar beating, our lab has previously  
109 reported that the ventral flagella are not required to maintain attachment of *Giardia*  
110 trophozoites to surfaces (8). We used a pharmacological approach to confirm these findings  
111 and to test if the ventral flagella contribute to initiating attachment. NiCl<sub>2</sub> has been used in a  
112 variety of systems to inhibit flagellar beating (9). Treatment of *Giardia* trophozoites with NiCl<sub>2</sub>  
113 inhibits beating of all eight flagella (Figure 2D). Attached trophozoites treated with NiCl<sub>2</sub> retain  
114 proper membrane surface contacts including a complete seal and bare area.

115

116 Control cells were allowed to attach for 30 mins prior to challenge with 2 ml/min flow and all  
117 tests were normalized to control attachment efficiency (Figure 2C). To test if the flagella were  
118 important for maintaining attachment, cells were allowed to attach for 30 mins, 25mM NiCl<sub>2</sub>  
119 was then added to the chamber, and attached cells were challenged with 2 ml/min flow once  
120 flagellar beating ceased. No significant difference was observed in attachment deficiency  
121 consistent with the observation that ventral flagellar beating is not required for maintaining

122 attachment. To test if the flagella were important for initiating attachment, cells were pre-  
123 incubated with 25mM NiCl<sub>2</sub> prior to addition to the flow chamber and allowed to attach for 30  
124 mins before challenge with 2 ml/min flow. We observed a significant 27% reduction in  
125 attachment efficiency for pre-treated cells compared to control cells indicating ventral flagellar  
126 beating is important for initiating attachment.

127

### 128 The lateral crest imparts a seal to fluid flow

129 In an ongoing GFP screen, our lab has discovered forty proteins that localize to either the outer  
130 disc margin or the lateral crest. These proteins display variability in their localization that  
131 emphasizes both the ventral groove and overlap regions (5). We hypothesize that the lateral  
132 crest surrounding the outside of the ventral disc is responsible for seal formation. This  
133 hypothesis is supported by previous DAP\_16343 knockdown data wherein open discs with  
134 broken lateral crests do not properly progress through the stages of attachment and display  
135 erroneous membrane/surface contacts (8).

136

137 We utilized diffusion of fluorescent microspheres (FluoSpheres) to investigate fluid flow and  
138 ventral disc seal formation in attached cells (Figure 3). Trophozoites were allowed to attach  
139 and FluoSpheres were added just prior to imaging. Time lapse videos were collected (Figure  
140 3A) and projected to view diffusion of FluoSpheres around the attached cells (Figure 3C).  
141 Consistent with seal formation, beads rarely entered into the space directly below the ventral  
142 disc. Beads that did enter underneath the disc did so exclusively at the ventral groove region

143 indicating fluid flow at this region (Figure 3A). After entering the space below the disc, beads  
144 could ricochet off the lateral crest perimeter and exit at the ventral groove region parallel with  
145 the ventral flagella. These observations are consistent with a hydrodynamic model in which the  
146 ventral flagella draw fluid out from underneath the ventral disc to generate negative pressure.

147

148 We repeated the bead diffusion assay in and DAP\_16343 knockdown cells and observed a  
149 severe defect in the ability of only DAP\_16343 cells to form a seal (Figure 3B). FluoSpheres  
150 were observed to freely enter areas of lateral crest breakage in DAP\_16343 knockdown cells.  
151 After entering underneath the disc, FluoSpheres were swept out from under the disc in line  
152 with the ventral flagella (Figure 3B). This observation is consistent with the idea that the  
153 ventral flagella serve to pull fluid out from underneath the disc in order to generate negative  
154 pressure.

155

156 Line scans indicate a decrease in GFP signal at the ventral groove region for cells under which  
157 beads entered, consistent with an 'opened gate' state (Figure 3C). In cases where beads  
158 approached the ventral groove region but did not enter, GFP signal was consistent with a closed  
159 ventral groove state. We observed the same result using three different candidate markers of  
160 the lateral crest (13981-gfp, 17096-gfp, 17231-gfp) (supplemental data). Three dimensional  
161 imaging of recently attached trophozoites indicates both open and closed states at the ventral  
162 groove region (Figure 3D).

163



164 Dynamic movement of ventral groove region

165 We next wanted to investigate the lateral crest during attachment of trophozoites to determine  
166 whether the lateral crest is a driver of seal formation. Kymographs of time lapse videos at the  
167 plane of attachment using three different markers (13981-gfp, 12139-gfp, 86676-gfp) indicate  
168 increases and decreases of GFP signal specifically at the ventral groove region consistent with  
169 movement in the Z-axis (Figure 4). Kymographs of detaching cells indicate that the ventral  
170 groove region rises to break the surface seal prior to other areas of the lateral crest and lastly  
171 the entire cell detaches. We performed the same experiment using the 86676-gfp strain to  
172 determine if the observed movement was specific to the outside of the disc or the entire disc  
173 body. The ventral disc was observed to change between flattened and domed shapes and the  
174 most dramatic movement was observed at the ventral groove region (Figure 4C).

175

176 DAP\_7268 is necessary for domed ventral disc ultrastructure but not lateral crest formation

177 Morpholino anti-sense oligo based knockdown is the current standard for gene knockdown in  
178 *Giardia* (8, 10, 11). This tool has been used previously to disrupt the ventral disc architecture  
179 using anti-DAP\_16343 morpholino (Figure 5a) (12). We found that morpholino knockdown of a  
180 new ventral disc protein, DAP\_7268, results in a disrupted disc phenotype that differs from  
181 DAP\_16343 knockdown (Figure 5a). In the DAP\_86676-gfp (dGiardin) background strain,  
182 knockdown of DAP\_7268 results in a break in the left lobe of the ventral disc body that is visible  
183 in the Z axis (Figure 5C). This break appears to be regarded as a ventral disc edge because the  
184 outer disc proteins DAP\_13981-gfp and DAP\_12139-gfp localize to this region (Figure 5A, Supp).

185 Unlike the open disc phenotype typical of DAP\_16343 knockdown cells, DAP\_7268 knockdown  
186 cells retain a fully contiguous lateral crest (Figure 5A). Fluorescent beads were not observed to  
187 enter underneath the disc of DAP\_7268 knockdown cells supporting the idea that this  
188 phenotype retains a fully functional seal.

189

190 The domed shape of the ventral disc has been hypothesized to be important for functional  
191 attachment (12). We quantified ventral disc ultrastructure by measuring the angle at which the  
192 ventral disc contacts the attachment surface. Two different ventral disc markers (dGiardin-gfp,  
193 aTubulin-gfp) indicated an average angle of ~17degrees ventral disc angle for attached cells at  
194 37C. Both DAP\_7268 and DAP\_16343 knockdown cells were significantly flattened to  
195 ~8degrees compared to parent DAP\_86676gfp cells (Figure 5B,C).

196

#### 197 Knockdown phenotypes poorly resist shear stress

198 We next wanted to ask whether the ability to form a lateral crest seal offers an attachment  
199 benefit to DAP\_7268 knockdown cells compared to DAP\_16343 knockdown cells in the shear  
200 stress flow assay. DAP\_16343 knockdown results in a flattened disc and incompletely formed  
201 lateral crest seal whereas DAP\_7268 knockdown results in a flattened disc that retains a fully  
202 formed lateral crest seal (Figure 5a). Both DAP\_16343 knockdown and 7268 knockdown cells  
203 displayed significant defects in their ability to resist 2ml/min of flow in our assay. We found  
204 that the ability to form a seal did not offer an attachment advantage to 7268 knockdown cells

205 as there was no significant difference in the ability of 7268 knockdown cells to resist shear flow  
206 compared to DAP\_16343 knockdown cells (Figure5d).

207

### 208 Ventral disc curvature is critical for attachment

209 We sought to determine whether ventral disc curvature could explain the attachment defects  
210 observed in our knockdown cells. *Giardia* trophozoites grown in laboratory conditions are  
211 commonly removed from culture vessels by placing the tubes on ice until cells detach. To  
212 reproduce this phenomenon, imaging plates were placed on ice and immediately imaged to  
213 observe the curvature of the disc within ‘detached’ cells. We observed a significant decrease in  
214 the ventral disc angle after incubation on ice to ~8degrees indicating the ventral disc’s domed  
215 ultrastructure is flexible and flattened in iced detached cells (Figure 6A).

216

217 The rigidity of the attachment surface may play a role in the degree to which ventral discs  
218 generate curvature. We cultured *Giardia* on a monolayer of MCF 10A human epithelial cells  
219 (ATCC CRL-10317) to determine the ventral disc attachment angle on human cell membranes  
220 that are more deformable than glass or plastic. Ventral discs displayed a small yet significant  
221 increase in curvature when attached to the human cells. Consistent with suction, human cell  
222 membranes appeared to be pulled into the space underneath the disc (Figure 6B). We next  
223 wanted to determine whether the ventral disc structure is curved *per se* or if curvature is  
224 dependent on cellular factors. *Giardia*’s microtubule cytoskeleton, including the ventral disc  
225 and all eight flagella, can be readily extracted using detergent buffers (Figure 6C). Isolated

226 ventral discs displayed a significant increase in curvature to ~25 degrees at 37C. We imaged  
227 these isolated ventral discs after incubating on ice to determine if temperature alone is  
228 sufficient to drive disc conformational changes. Cold isolated ventral discs displayed a  
229 significant decrease in curvature compared to warm isolated ventral discs from 17degrees to  
230 8degrees, although not to the same degree as seen within live cells indicating that cell factors  
231 or physical constraints within the cell likely contribute to ventral disc curvature *in vivo*.  
232 (Microtubule dynamic instability has not been observed within the ventral disc, although small  
233 changes to microtubule polymerization could help explain disc conformational dynamics.  
234 Treatment of warm attached cells with the drugs taxol and nocodazole that target microtubule  
235 dynamic instability did not have an effect on ventral disc attachment angle.)

236

## 237 **Discussion**

238 Of the 85 proteins that are currently known to localize to the ventral disc (5), only two have  
239 been found to be essential for disc biogenesis and/or attachment. DAP\_16343 (MBP, median  
240 body protein) was first described to be essential and served as a proof of principle that  
241 knockdown of a single DAP could disrupt ventral disc ultrastructure and affect attachment (12).  
242 Exactly why knockdown of 16343 results in an incompletely formed disc with collapsed  
243 microtubule/microribbon spacing remains to be determined. Little is known about the timing  
244 of ventral disc biogenesis, how ventral disc microtubule and microribbon polymerization is  
245 controlled, how proteins are targeted to specific regions, etc. Regulation of ventral disc  
246 biogenesis is particularly interesting considering two new ventral discs are generated in a

247 relatively short time during cell division (10). Differing knockdown phenotypes can help us  
248 investigate both ventral disc biogenesis and attachment mechanisms.

249

250 Here is the first description that DAP\_7268 is an essential ventral disc protein. Knockdown of  
251 DAP\_7268 resulted in a less drastic ventral disc structural phenotype than knockdown of  
252 DAP\_16343, although both exhibited similar attachment defects in our shear stress test. The  
253 break in the ventral disc occurred in the same relative position of the disc body for every 7268  
254 knockdown cell observed. This crack may be mistaken as a ventral disc edge by the DAP\_7268  
255 knockdown cells because proteins that localize to the lateral crest/disc margin also localize to  
256 this region (Figure 5A). Ankyrin structural motifs are predicted within 33 ventral disc protein  
257 (13), including DAP\_7268, which has ankyrin repeats at both the N and C termini (5). Ankyrin  
258 repeats are believed to be facilitators of protein/protein interactions so DAP\_7268 could be a  
259 structural component of a ventral disc substructure. Future studies will determine which  
260 ventral disc substructure each DAP localizes to in order to assign function to these  
261 substructures in disc biogenesis and functional attachment.

262

263 The ventral disc is a microtubule structure that is unique to *Giardia* species, although some  
264 DAPs have homologs in *Giardia's* closest relative *Spironucleus* spp. Tubulin is conserved across  
265 eukaryotes. *Giardia*  $\alpha$ Tubulin shares 94% sequence identity with human tubulin. How has  
266 *Giardia* adapted conserved components to build the ventral disc, a completely novel organelle  
267 with novel function? Some hypothesize that the ventral disc is a modified flagellum, consistent

268 with ventral disc microtubules sharing the basal bodies with flagellar microtubules. However,  
269 most of the proteins contained within the ventral disc are categorized as ‘hypothetical’ because  
270 they do not share homology with any known characterized proteins (5). It is likely these novel  
271 proteins have allowed for the invention of this novel organelle. Hypothetical proteins in the  
272 ventral disc are important from a disease perspective because proteins that are necessary for  
273 ventral disc biogenesis and functional attachment are not found in the human genome making  
274 them good candidate drug targets.

275

276 The ventral disc structure was first viewed in detail using EM by Cheissin in 1964 (14). This  
277 marks the beginning of the controversy over whether or not the disc is a dynamic structure as  
278 Cheissin opines that the ventral disc structure appears considerably elastic. The ventral disc of  
279 *Giardia muris* attached to the mouse intestine was next observed by Friend in 1966 (15). Friend  
280 argues that the disc appears very rigid and that the disc itself is not responsible for attachment,  
281 a point we disagree with based on our knockdown phenotypes and live imaging. In a series of  
282 papers beginning 1973, Holberton used EM and live imaging to observe the ventral disc and the  
283 waveform of the ventral flagella of *Giardia muris* (16), and develops the hydrodynamic model of  
284 *Giardia* attachment that has prevailed for decades . In this model, lateral channels are posited  
285 to exist outside the disc and the beating of the ventral flagella causes fluid flow through these  
286 channels to the ventro-caudal groove to generate hydrodynamic attachment forces. However,  
287 the lateral channels necessary for hydrodynamic fluid flow have not been observed in live cells.

288

289 Our lab previously sought to test the hydrodynamic model using two genetic methods that  
290 disrupt normal ventral flagellar beating (8). In that study, ventral flagellar beating was observed  
291 not to be necessary to maintain attachment of *Giardia* to surfaces, although the flagella were  
292 observed to be important for initially establishing attachment and orienting the cell to the  
293 attachment plane. Consistent with these earlier results, FluoSphere flow in our bead diffusion  
294 assay did not mimic fluid flow through possible lateral channels.

295

296 It is necessary to consider that *Giardia muris* and *Giardia lamblia* are different species with  
297 different host specificities and may rely on different, albeit similar, attachment mechanisms.  
298 The hydrodynamic model relies on a constantly open ventral groove region that is lacking in  
299 *Giardia muris* (see old EM, (16), EM of both species in 1981 (17)). Many proteins in *Giardia*  
300 *lamblia* specifically target to the ventral groove region, and these proteins are lacking in the  
301 *Giardia muris* genome (personal correspondence, Staffan Svard). GFP localization patterns  
302 suggest that there are distinct substructures in the ventral groove region, each composed of  
303 unique proteins.

304

305 Despite positing that the ventral disc of *Giardia muris* is a rigid structure (16, 18, 19), Holberton  
306 later argued that the ventral groove region (posterior notch) is flexible in isolated discs of  
307 *Giardia lamblia* (17). Holberton observed flexible unwinding of this region with and without the  
308 addition of ATP, arguing that this flexibility is not active but has stored elastic energy (17). Our  
309 time lapse imaging of attaching *Giardia lamblia* trophozoites shows clear movement of the

310 ventral groove *in vivo* that is consistent with flexibility of this region that we believe is  
311 important for the forming and breaking of a seal during attachment. It remains to be  
312 determined how movement of the ventral groove region is facilitated *in vivo*.

313

314 Our observations indicate that temperature is sufficient for altering ventral disc curvature and  
315 that cold discs are flattened out. This data helps explain why placing *Giardia* culture vessels on  
316 ice results in detachment of the parasite. The temperature/disc shape relationship may ensure  
317 parasites only attach within living hosts. Isolated ventral discs displayed an increase in  
318 curvature indicating that a domed shape is not actively generated but rather is inherently built  
319 into the ventral disc structure. It also remains to be determined if ventral discs actively flatten  
320 out during routine attachment. Recent advances in optical imaging (Lattice Light Sheet) will  
321 allow for direct imaging of ventral disc dynamics in real time.

322

323 If suction is the main mechanism of attachment, and the lateral crest is responsible for forming  
324 a seal, then why do some MBP knockdown cells with severe lateral crest defects remain  
325 attached? In these cases the outer membrane shows a clear blebbing that fills in the gap. This  
326 membrane could serve as a redundant seal that allows for suction in the event of lateral crest  
327 disruption.

328



329 Ventral disc attachment mechanism that we argue for is akin to that described by Cheissin in  
330 1964 in which the incessant beating of the ventral flagella pulls fluid out from under the disc  
331 (14). Together with a flexible ventral disc and mobile lateral crest, a seal is formed that secures  
332 the parasite to the attachment surface by the negative pressure that is generated. Therefore,  
333 the lateral crest acts as a barrier that does not allow fluid to enter or exit underneath the disc,  
334 except when a break is generated at the ventral groove. This ventral groove is the region at  
335 which we observed movement of FluoSpheres to enter and exit the space underneath the  
336 ventral disc. The opening and closing of this gate is also consistent with our observations that  
337 the ventral flagella contribute to establishing attachment, but are not necessary for maintaining  
338 attachment.

339

## 340 **Materials and Methods**

### 341 *Giardia* Culture

342 *Giardia* intestinalis strain WBC6 (ATCC 50803) trophozoites were maintained at 37°C in  
343 modified TYI-S\_33 medium with bovine bile (20) in 16-ml screw-cap tubes (Fisher Scientific).  
344 Upon reaching confluency, the strain was split by first placing tubes on ice for 15 minutes then  
345 transferring 0.5ml of detached culture to 11.5ml of warmed media. Prior to imaging, cells were  
346 washed 3x with warm 1xHBS to remove autofluorescence associated with culture medium.

347

### 348 *Giardia* Strain Generation

349 All strains were constructed as previously described (21). For C-terminal GFP episomal tag: All  
350 candidate DAP PCR forward primers (see Table S1) were designed to bind 200 bp upstream of  
351 the gene to include the *Giardia* native promoter and contained the sequence CACC at the 5'  
352 end to facilitate directional cloning. Blunt-ended PCR amplicons were generated by PCR using  
353 PfuTurbo Hotstart PCR Mastermix (Stratagene) with *Giardia* intestinalis strain WBC6 genomic  
354 DNA. The candidate DAP PCR amplicons were subsequently subcloned into the Invitrogen  
355 pENTR/D-TOPO backbone to generate Gateway entry clones. Inserts in entry clones were  
356 sequenced to confirm the identity and correct orientation of the gene. To construct DAP-GFP  
357 fusions, positive entry clones were then recombined, via LR reaction, with a 1-fragment GFP  
358 tagging *E. coli*/*Giardia* shuttle destination vector (pcGFP1F.pac) using LR Clonase II Plus  
359 (Invitrogen). LR reactions were performed using 100 ng pcGFP1F.pac and 150 ng of DAP entry  
360 clone plasmid DNA. Positive clones were screened by digestion with *AscI*, and bulk plasmid DNA  
361 was prepared using Qiagen's Plasmid Midi Kit. To create C-terminal GFP-tagged candidate DAP  
362 strains, *Giardia* intestinalis strain WBC6 was electroporated with roughly 20 mg of plasmid DNA  
363 (above) using the GenePulserXL (BioRad) under previously described conditions. Episomal DAP-  
364 GFP constructs were maintained in transformants using antibiotic selection (50 mg/ml  
365 puromycin).

### 366 Morpholino Gene Knockdown

367 Morpholinos were designed to target the first 24 bases of the gene and 1 base upstream of the  
368 5' end. Morpholino sequences used in this study are as follows antiDAP\_16343:  
369 GCTGAAAACCATAGCCTCGGACATT, anti7268: GAACCAGTCGCTCGCGGTTTGCATG. Prior to  
370 morpholino knockdown, trophozoites of DAP86676-GFP, DAP17096-GFP, and DAP12139-GFP-

371 tagged strains were grown to confluence. Cells were washed with 12 ml of fresh medium,  
372 quickly suspended again in 12 ml of medium, and then chilled on ice for 15 mins. The detached  
373 trophozoites were then centrifuged at 900xg for 5 min at 4°C. The resulting pellet was  
374 resuspended in 0.27 ml of fresh medium. This was added to a 0.4-cm electroporation cuvette  
375 along with 0.03 ml of morpholino at a final concentration of 100mM. The cuvette was chilled on  
376 ice for 15 min, electroporation was performed, and the cells were placed back on ice for 15  
377 mins. These transformed cells were then incubated at 37°C for 24 h. Cell morphology and  
378 attachment were assessed in both live and fixed trophozoites after morpholino knockdown.

379

#### 380 Structured Illumination Microscopy

381 3D stacks were collected at 0.125 um intervals on the Nikon N-SIM Structured Illumination  
382 Super-resolution Microscope with a 100x/NA 1.49 objective, 100 EX V-R diffraction grating, and  
383 an Andor iXon3 DU-897E EMCCD. Images were recollected and reconstructed in the “2D-SIM”  
384 mode (no out of focus light removal; reconstruction used three diffraction grating angles each  
385 with three translations).

386

#### 387 Confocal Microscopy

388 3D stacks and time lapse movies were acquired of live cells grown in 96-well #1.5 black glass  
389 bottom imaging plates (In Vitro Scientific). Images were acquired with the spinning-disk  
390 module of a Marianas SDC Real-Time 3D Confocal-TIRF microscope (Intelligent Imaging

391 Innovations) fit with a Yokogawa spinning-disk head, a 63×/1.3 NA oil-immersion objective, and  
392 electron-multiplying charge-coupled device camera. Acquisition was controlled by SlideBook 6  
393 software (3i Incorporated). All raw images were exposed and scaled with the same parameters.

394

#### 395 Ventral Disc Angle Measurements

396 Cells were allowed to attach to imaging plates at 37C for 30 mins in 1x HBS, washed 3x with  
397 1xHBS to remove unattached cells, and 100 ul of warm 1xHBS was added. Next, 100ul of 37C  
398 3% low melt agarose in 1xHBS was added to a final concentration of 1.5% agarose to immobilize  
399 cells on the imaging plates. Immobilization was not observed to affect disc curvature. Slices  
400 were taken at 0.2 um intervals for 8 um to capture the entire disc. Disc curvature images was  
401 generated by reslicing the stack laterally across the posterior portion of the bare area and  
402 angles were measured in FIJI. At least 30 cells were measured on three separate days totaling  
403 90 cells for each condition.

404

#### 405 FluoSphere Diffusion Assay

406 Cells were allowed to attach to imaging plates at 37C for 30 mins in 1x HBS, washed 3x with  
407 1xHBS to remove unattached cells, and 200 ul of warm 1xHBS was added. FluoSpheres  
408 Carboxylate-Modified Microspheres (0.2 um, red fluorescent) beads were pretreated for 24  
409 hours by transferring 5 ul from stock to 1 ml 1xHBS containing 1%BSA and stored at 4C to help  
410 prevent clumping before use. At time of assay, 20 ul of this diluted solution was added to each

411 well and time lapse imaging began immediately. Single focal planes were acquired every 1 s for  
412 5 minutes with definite focus. Image analysis was performed in FIJI.

413

#### 414 Shear Force Assay

415 Metamorph image acquisition software (MDS Technologies) was used to collect single focal  
416 plane images using a Leica DMI 6000 wide-field inverted fluorescence microscope with a 10x  
417 objective. Fluorescent images were collected before and after challenge with flow for shear  
418 stress. DIC time lapse movies were collected during flow challenge by imaging the same focal  
419 plane every second for 60 seconds. A fresh chamber was used for each assay in Ibidi mSlide VI  
420 0.4 flow chambers. Cells in frame were imaged for 20 seconds, challenged with flow for 20  
421 seconds, followed by 20 seconds more video before final fluorescent image was collected.  
422 Attached cells were counted by overlaying the before image (false colored green) over the after  
423 image (false colored red). Green cells were counted as unable to resist flow challenge whereas  
424 yellow cells were able to resist challenge. Percent attached was calculated by  
425  $(\#yellow)/(\#yellow + \#green)$ . In some cases, percentages were normalized to control from a  
426 parallel run.

427 **Acknowledgements**

428 Human MCF 10A cells were a kind gift from Nont Kosaisawe and John Albeck (Dept. MCB, UC  
429 Davis). Thank you to Michael Paddy of the UC Davis MCB Microscopy Core with helpful advice  
430 on SDC and SIM microscopes. Kari Hagen, Shane McNally, and Eric Walters provided helpful  
431 readings of manuscript drafts.

432

433 **Figure Legends**

434 **Figure1: The ventral disc comprises distinct regions and is responsible for progressing through**  
435 **the stages of attachment.** Giardia cells contain four pairs of flagella as well as the ventral disc.  
436 Ventral disc microtubules spiral away from the flagellar basal bodies through distinct regions:  
437 the disc body, the ventral groove, the disc margin, and the overlap zone. The lateral crest  
438 surrounds the outside of the disc (1a). 3D-SIM microscopy of a GFP-tagged protein known to  
439 localize to the disc (DAP\_86676, delta-giardin) indicates the disc's position within the cell and  
440 the disc's domed shape (1b). Attachment progresses through four distinct stages defined by  
441 membrane contacts with the attachment surface: ventrolateral flange (VLF), lateral crest (LC),  
442 bare area (BA), ventral groove (VG), ventral flagella (VF), ventral disc (VD), lateral shield (LS).  
443 Skimming cells display VLF contacts before a complete seal is formed beneath the LC and VD.  
444 Next, LS contacts increase as the cell body approaches the surface and finally the BA contacts  
445 the surface.

446

447 **Figure2: Flagellar beating contributes to initiating but not maintaining attachment.** We  
448 developed a novel flow assay to challenge attached cells with shear stress. Fluorescent cells  
449 (86676gfp) are allowed to attach prior to being challenged with a specific flow rate. Before and  
450 after pictures are collected and false colored green and red, respectively (2a). Percent of cells  
451 that can resist the shear stress challenge are calculated and 90% of cells were able to resist  
452 2ml/min flowrate (2b). NiCl<sub>2</sub> treatment effectively ceases flagellar beating (2d). Cells were  
453 treated with NiCl<sub>2</sub> after attaching in the flow chamber or before attachment. Cells treated  
454 before attachment showed a significant decrease ability to resist 2ml/min flow (T-test, p≤0.05).  
455

456 **Figure3: Fluid flow in and out of the compartment below the ventral disc is governed by the**  
457 **disc margin.** Cells expressing an outer disc marker (DAP\_17096-gfp) were allowed to attach  
458 before addition of fluorescent microspheres (FluoSpheres) and diffusion of FluoSpheres was  
459 recorded. In some cases, microspheres entered the compartment beneath the disc at the  
460 ventral groove indicating fluid flow at this region (3a). In cases of discontinuity (MBPkd), beads  
461 were pulled into the disc compartment and swept out of the ventral groove parallel with the  
462 ventral flagella (3b). FluoSphere diffusion was recorded by imaging every second for five  
463 minutes. A maximum intensity projection of this timecourse indicates total FluoSphere  
464 diffusion (3c). Line scans at the ventral groove indicate a decrease in signal at the ventral  
465 groove in cases where FluoSpheres entered the disc compartment. Three-dimensional imaging  
466 of the ventral groove indicates both open and closed states (3d).  
467

468 **Figure4: Dynamic movement is observed at the ventral groove region.** Three different ventral  
469 disc markers display movement at the ventral groove region: 13981gfp (lateral crest), 12139gfp  
470 (disc margin, ventral groove), 86676gfp (disc body). Movies were recorded by imaging every  
471 second for five minutes. Kymographs were generated by tracing a line around the outer edge of  
472 the disc through the ventral groove region (black dotted line) and reslicing through the entire  
473 timecourse. Line plots were generated by drawing a line through the ventral groove region of  
474 the kymograph (white dotted line).

475

476 **Figure5: Knockdown of DAP\_16343 and DAP\_7268 result in flattened discs that poorly resist**  
477 **shear stress challenge.** DAP\_86676gfp and DAP\_17096gfp were used as markers of the disc  
478 body and lateral crest, respectively. Knockdown of DAP\_16343 (MBP) results in incompletely  
479 formed discs with a broken lateral crest. Knockdown of DAP\_7268 results in a broken disc that  
480 retains a completely formed lateral crest, as well as extraneous lateral crest deposition (5a).  
481 Disc curvature was quantified in three dimensional images by measuring the angle of the disc  
482 relative to the attachment surface in the DAP\_86676gfp and beta-tubulin-gfp strains (~18deg).  
483 Knockdown of both DAP\_16343 and DAP\_7268 results in flattening of the ventral disc to ~8deg  
484 (5B,C). Flow challenge of knockdown cells at 2ml/min was normalized to mispair morpholino  
485 control and indicates severe defects in ability to resist shear stress (5D).

486

487 **Figure6: Disc curvature is sensitive to temperature changes.** DAP\_86676gfp was used as a  
488 ventral disc marker to measure ventral disc curvature. Cells subjected to cold temperatures



489 (4C) result in flattened disc that mimic knockdown angles (~8deg). Cells attached to human cell  
490 lines display an increase in ventral disc curvature (~22deg) and detergent-extracted ventral  
491 discs display an even greater increase in curvature (~25deg). Isolated ventral discs subjected to  
492 cold temperature displayed a decrease in curvature from ~25deg to ~18deg. Drugs targeting  
493 microtubule dynamic instability (taxol, nocodazole) had no significant effect on disc curvature in  
494 live cells.

495 **Figure 7: Disc conformational model of *Giardia* attachment.**

496 Conformational changes of the ventral disc, together with ventral flagellar beating, generate the  
497 forces of hydrodynamic suction that enable attachment. Ventral flagellar beating established  
498 hydrodynamic flow (arrows). In early attachment, the disc adopts a flattened conformation that  
499 opens the disc margin and ventral groove regions (FLAT), allow flow underneath the disc. Disc  
500 doming then creates space underneath the disc, simultaneously closing the disc margin and  
501 raising the ventral groove (DOMED), modulating hydrodynamic flow. Lastly, the ventral groove  
502 closes prior to the formation of a disc perimeter seal by the lateral crest (SEALED), limiting flow  
503 underneath the disc.

504 **References**

505

506 1. Einarsson E, Ma'ayeh S, & Svard SG (2016) An up-date on Giardia and giardiasis. *Current opinion*  
507 *in microbiology* 34:47-52.

508 2. Dawson SC (2010) An insider's guide to the microtubule cytoskeleton of *Giardia*. *Cellular*  
509 *microbiology* 12(5):588-598.

510 3. Nosala C & Dawson SC (2015) The Critical Role of the Cytoskeleton in the Pathogenesis of  
511 *Giardia*. *Curr Clin Microbiol Rep* 2(4):155-162.

512 4. Hansen WR, Tulyathan O, Dawson SC, Cande WZ, & Fletcher DA (2006) *Giardia lamblia*  
513 attachment force is insensitive to surface treatments. *Eukaryot Cell* 5(4):781-783.

514 5. Nosala CaD, S.C. (2017) "Disc-o-Fever": getting down with *Giardia's* groovy microtubule  
515 organelle. *Trends In Cell Biology* in press.

516 6. Brown JR, Schwartz CL, Heumann JM, Dawson SC, & Hoenger A (2016) A detailed look at the  
517 cytoskeletal architecture of the *Giardia lamblia* ventral disc. *J Struct Biol* 194(1):38-48.

518 7. Schwartz CL, Heumann JM, Dawson SC, & Hoenger A (2012) A detailed, hierarchical study of  
519 *Giardia lamblia's* ventral disc reveals novel microtubule-associated protein complexes. *PLoS One*  
520 7(9):e43783.

521 8. House SA, Richter DJ, Pham JK, & Dawson SC (2011) *Giardia* flagellar motility is not directly  
522 required to maintain attachment to surfaces. *PLoS Pathog* 7(8):e1002167.

523 9. Ginger ML, Portman N, & McKean PG (2008) Swimming with protists: perception, motility and  
524 flagellum assembly. *Nature reviews. Microbiology* 6(11):838-850.

- 525 10. Hardin WR, *et al.* (2017) Myosin-independent cytokinesis in *Giardia* utilizes flagella to coordinate  
526 force generation and direct membrane trafficking. *Proc Natl Acad Sci U S A* 114(29):E5854-  
527 E5863.
- 528 11. Carpenter ML & Cande WZ (2009) Using morpholinos for gene knockdown in *Giardia intestinalis*.  
529 *Eukaryot Cell* 8(6):916-919.
- 530 12. Woessner DJ & Dawson SC (2012) The *Giardia* median body protein is a ventral disc protein that  
531 is critical for maintaining a domed disc conformation during attachment. *Eukaryot Cell*  
532 11(3):292-301.
- 533 13. Li J, Mahajan A, & Tsai MD (2006) Ankyrin repeat: a unique motif mediating protein-protein  
534 interactions. *Biochemistry* 45(51):15168-15178.
- 535 14. Cheissin EM (1964) Ultrastructure of *Lambliia Duodenalis*. I. Body Surface, Sucking Disc and  
536 Median Bodies. *J Protozool* 11:91-98.
- 537 15. Friend DS (1966) The fine structure of *Giardia muris*. *J Cell Biol* 29(2):317-332.
- 538 16. Holberton DV (1973) Mechanism of attachment of *Giardia* to the wall of the small intestine.  
539 *Transactions of the Royal Society of Tropical Medicine and Hygiene* 67(1):29-30.
- 540 17. Holberton DV & Ward AP (1981) Isolation of the cytoskeleton from *Giardia*. Tubulin and a low-  
541 molecular-weight protein associated with microribbon structures. *Journal of cell science* 47:139-  
542 166.
- 543 18. Holberton DV (1974) Attachment of *Giardia*-a hydrodynamic model based on flagellar activity. *J*  
544 *Exp Biol* 60(1):207-221.
- 545 19. Holberton DV (1973) Fine structure of the ventral disk apparatus and the mechanism of  
546 attachment in the flagellate *Giardia muris*. *Journal of cell science* 13(1):11-41.
- 547 20. Keister DB (1983) Axenic culture of *Giardia lamblia* in TYI-S-33 medium supplemented with bile.  
548 *Trans. R. Soc. Trop. Med Hyg.* 77:487-488.

549 21. Hagen KD, *et al.* (2011) Novel structural components of the ventral disc and lateral crest in  
550 *Giardia intestinalis*. *PLoS Negl Trop Dis* 5(12):e1442.

551

# Figure 1

A)

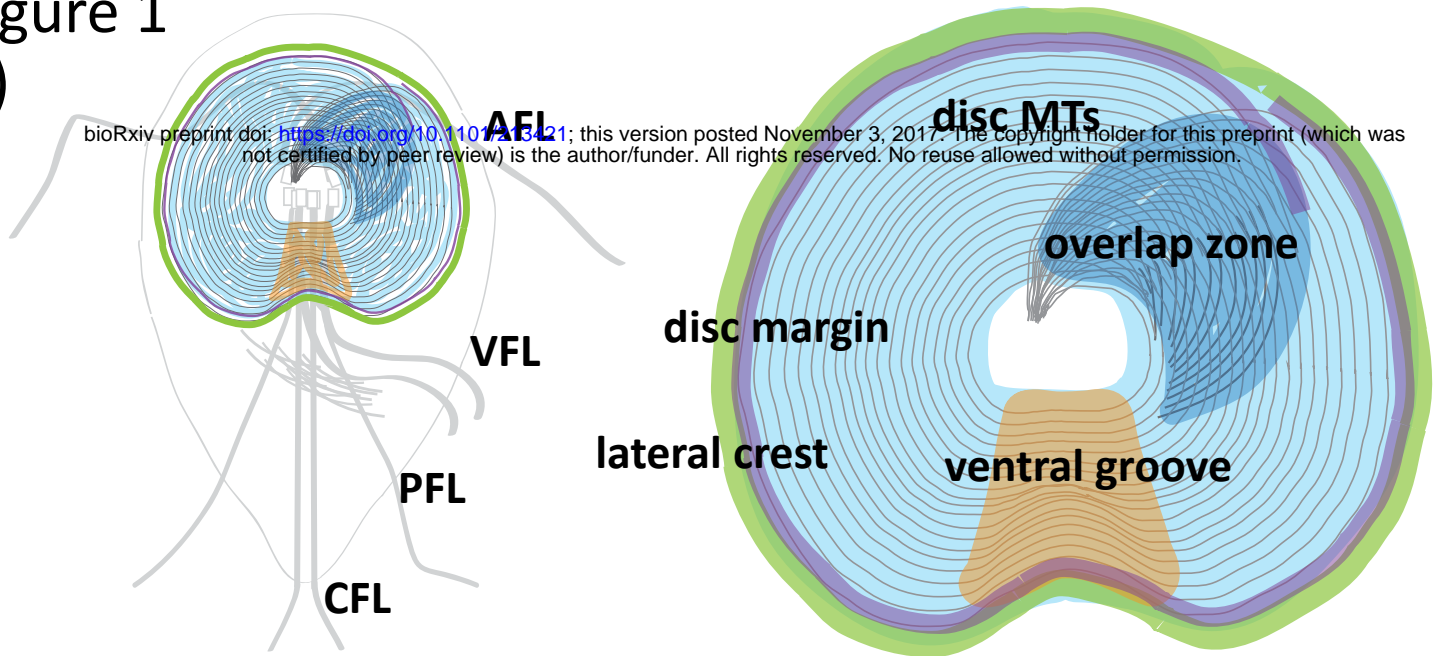

B)

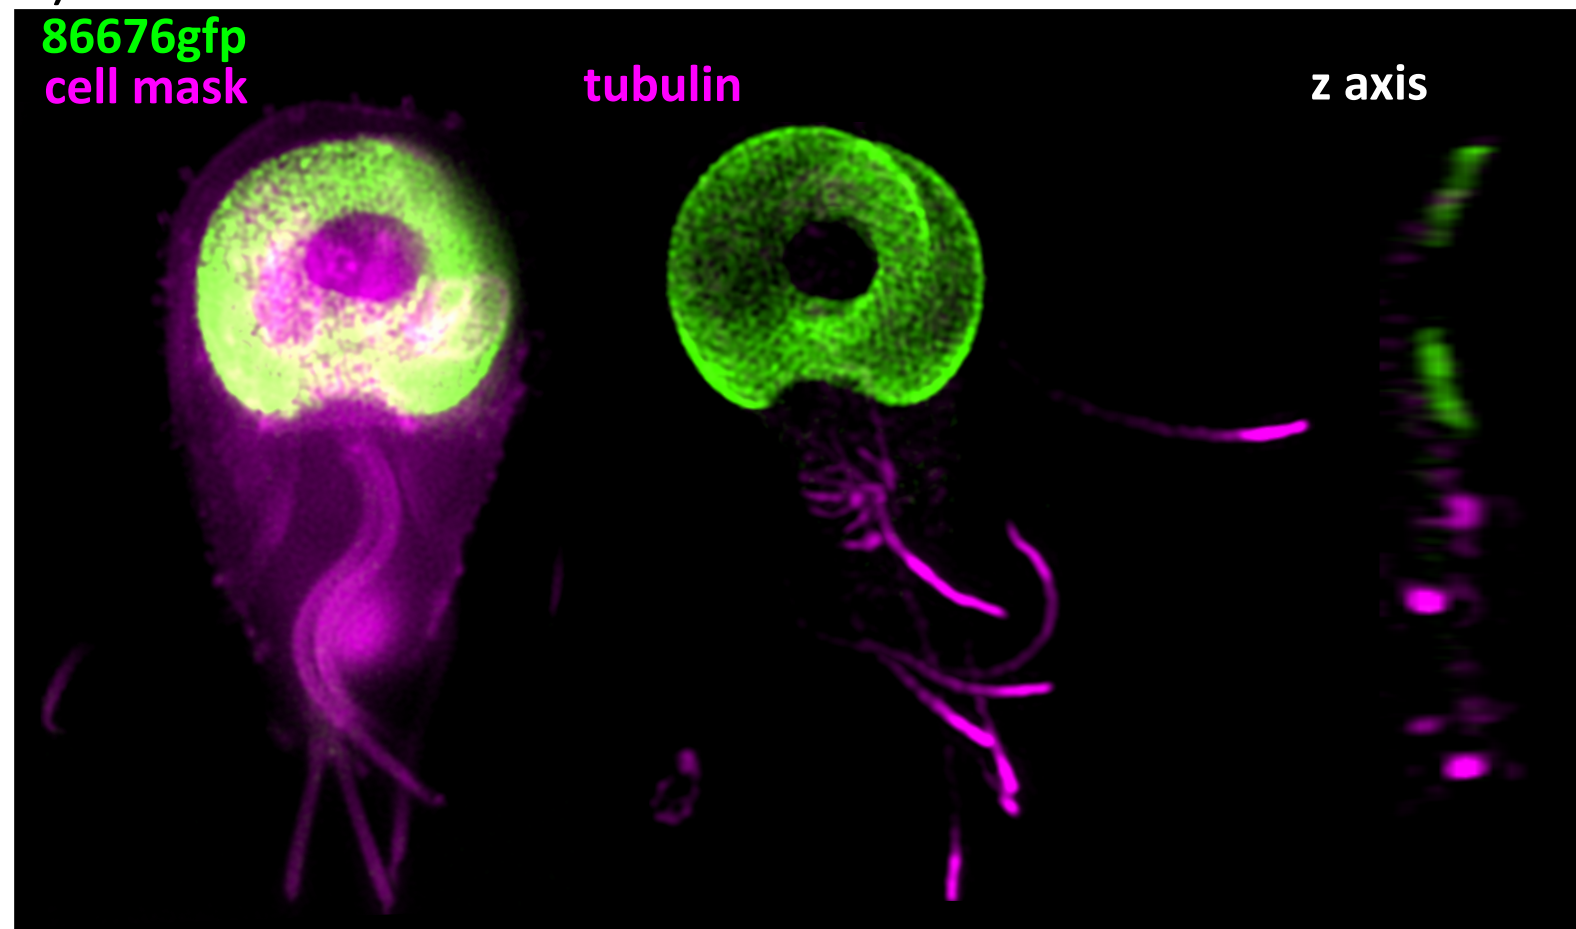

C)

**membrane contacts to attachment surface**

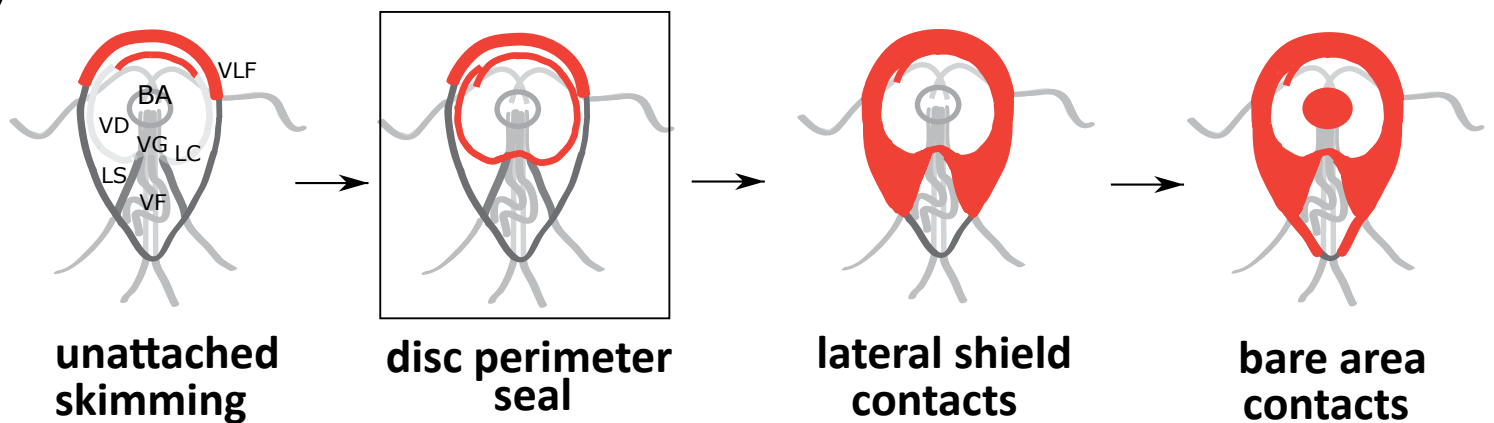

Figure 2  
A)

5ml/min flow

before

after

merge

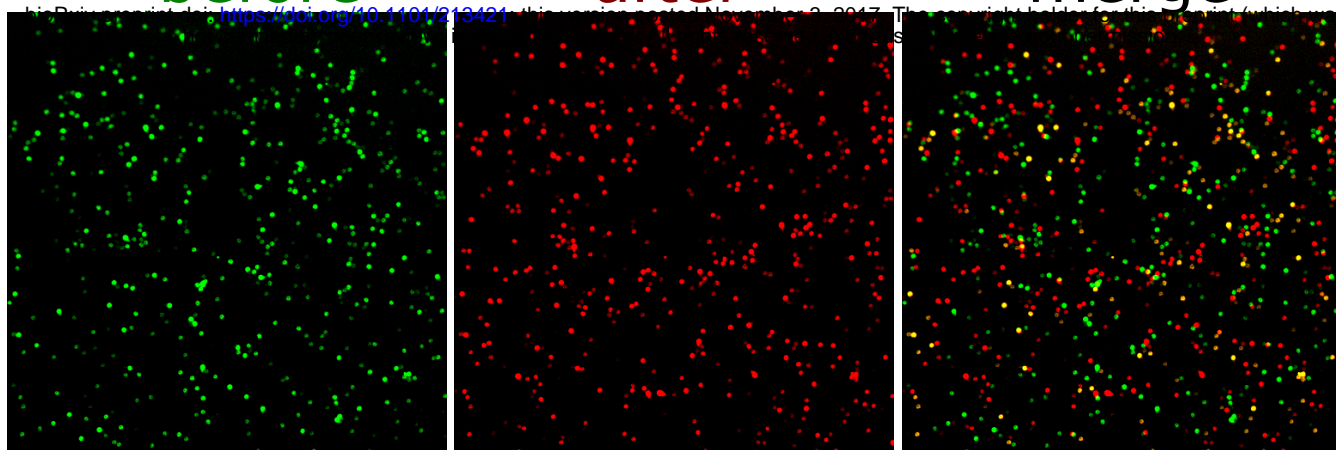

B)

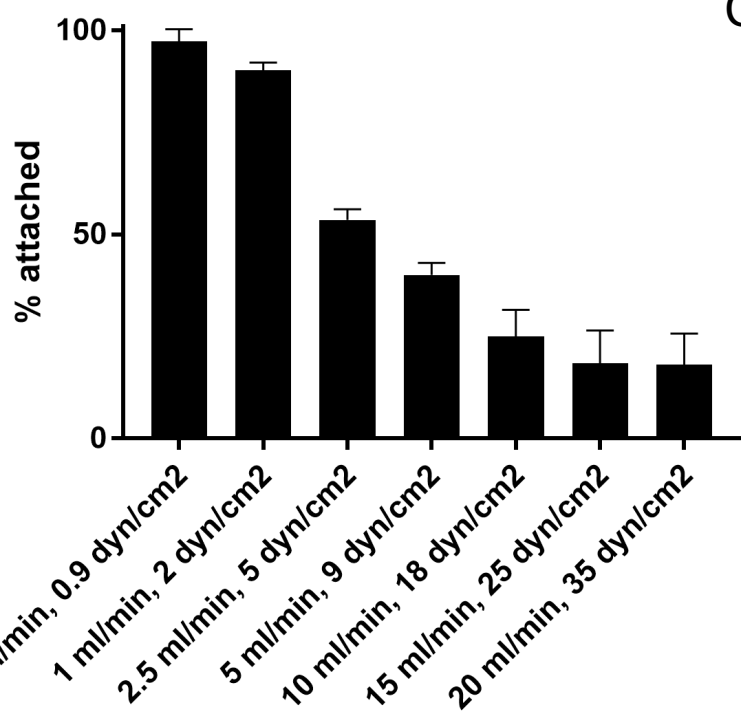

C)

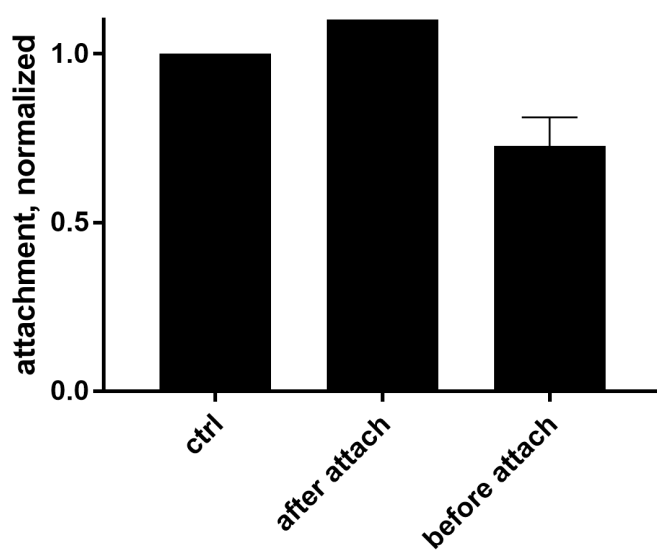

D)

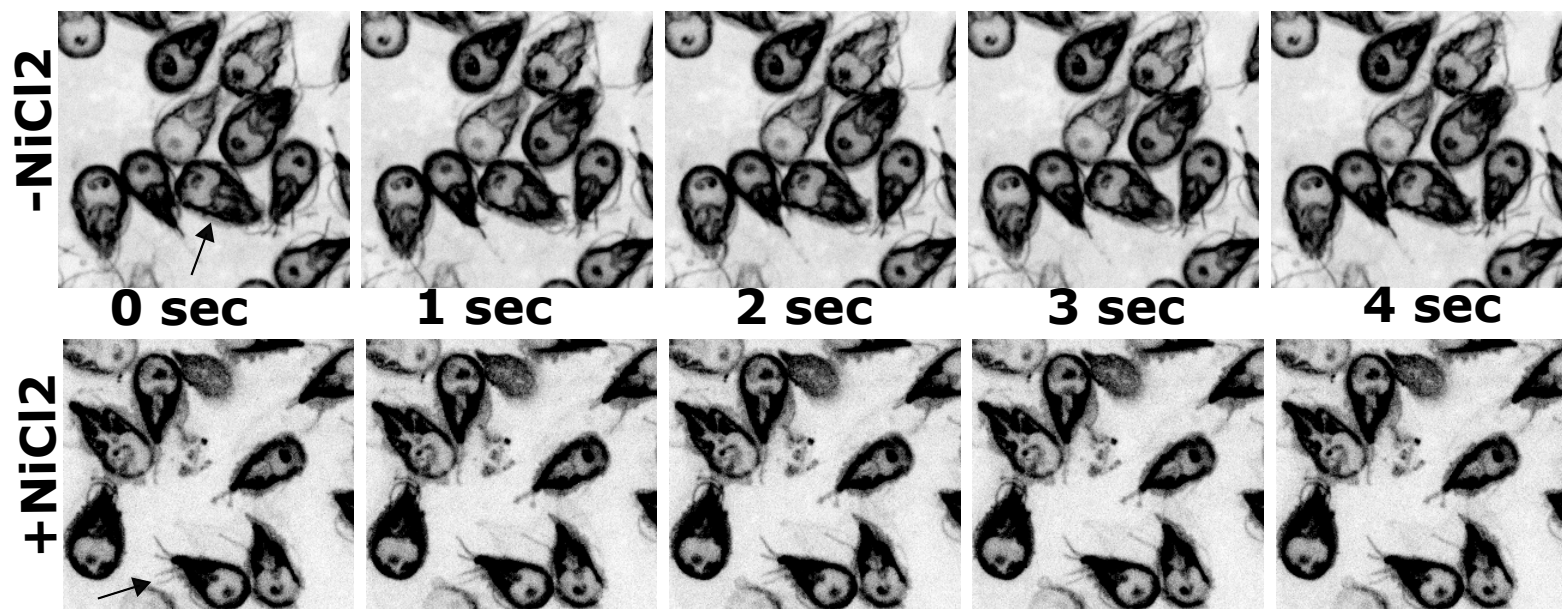

Figure 3

A) **17096gfp** fluospheres

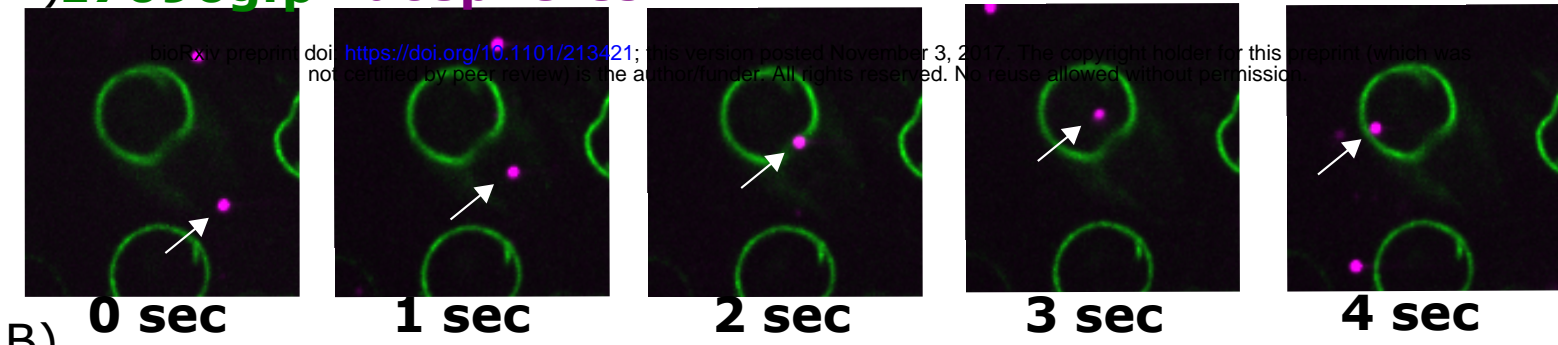

B) **MBPkd**

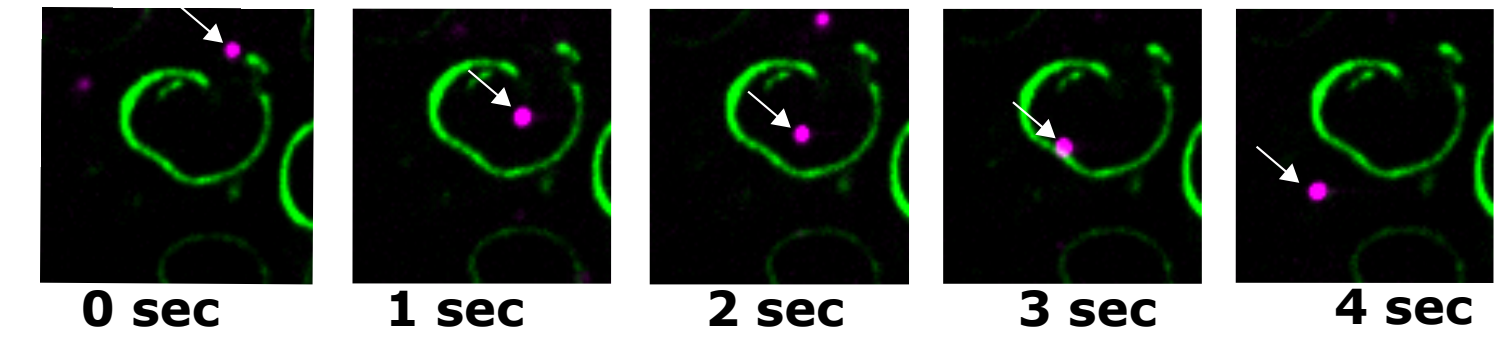

C)

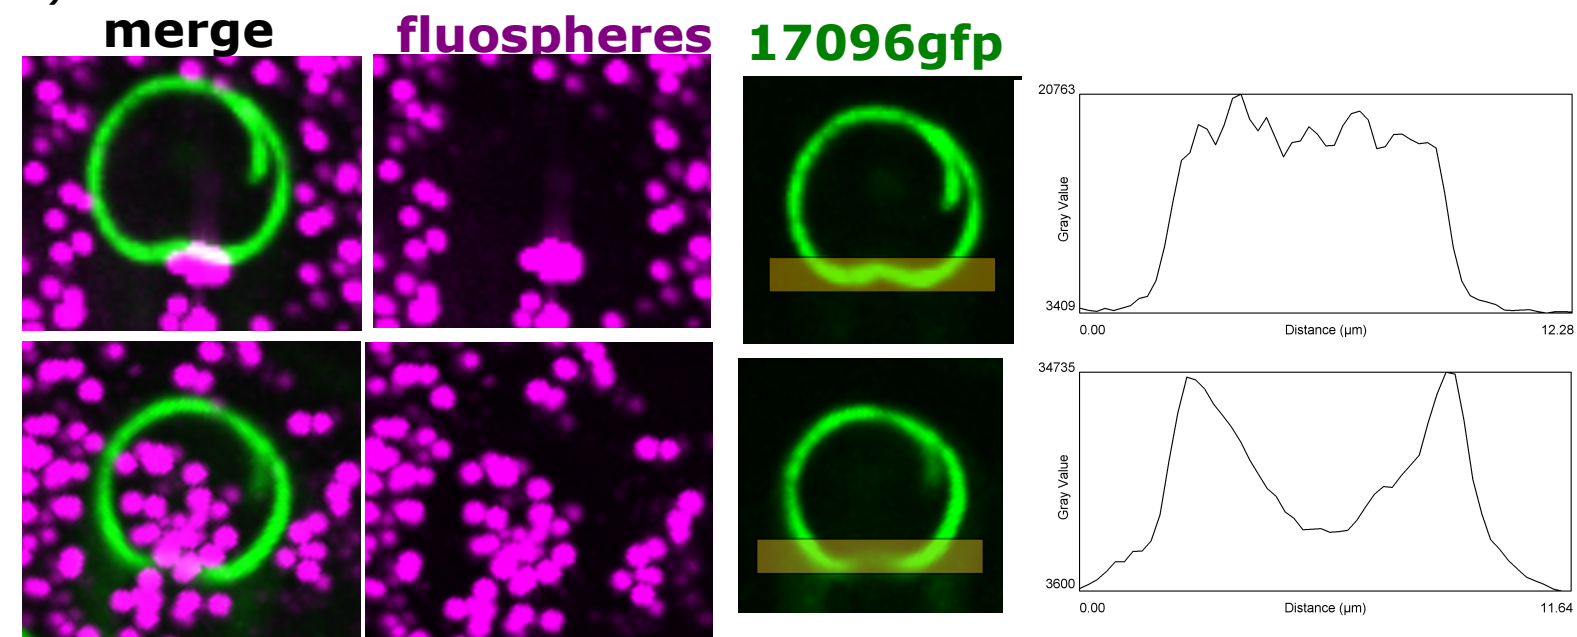

D) **open**

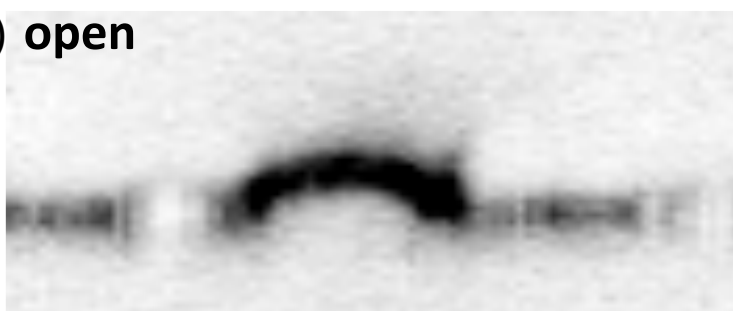

**closed**

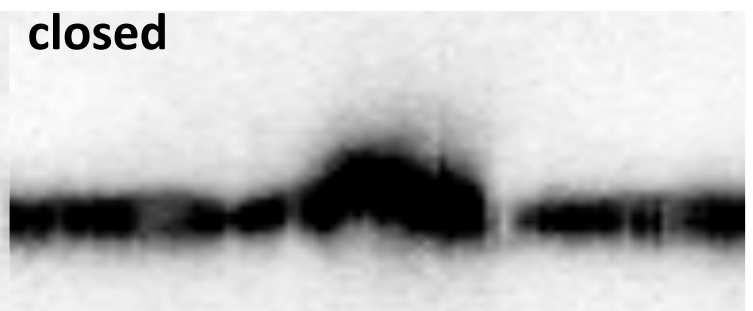

# Figure 4

## A)

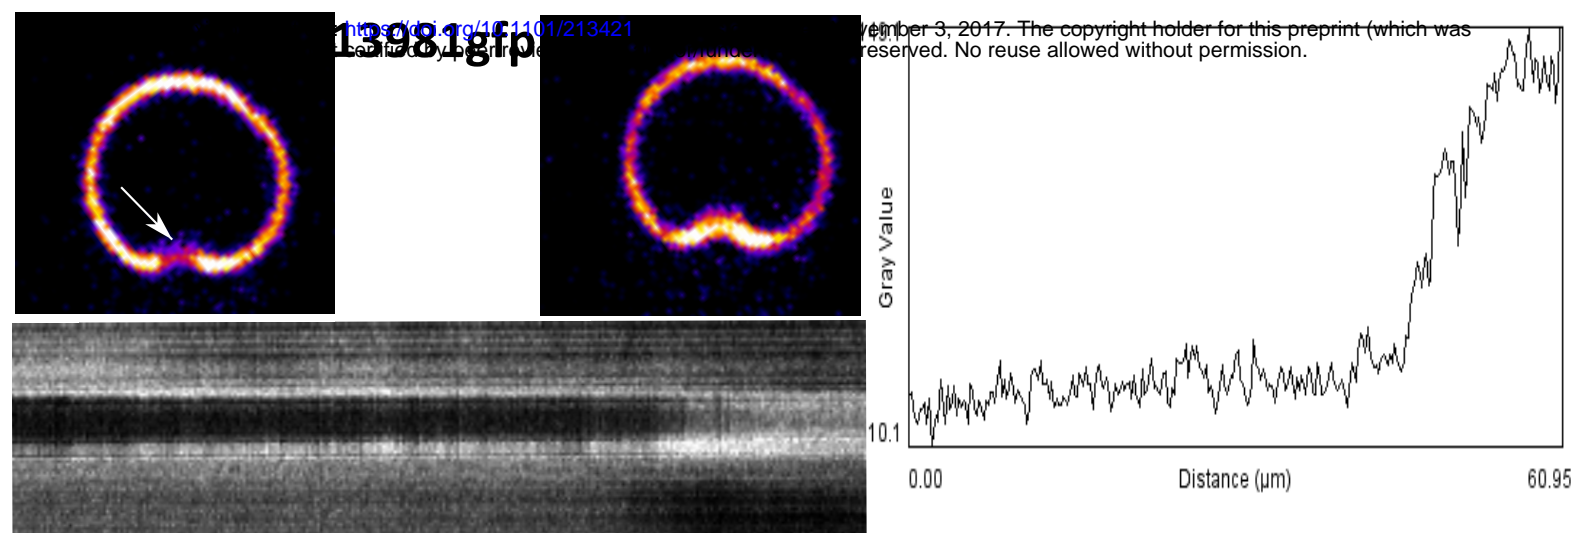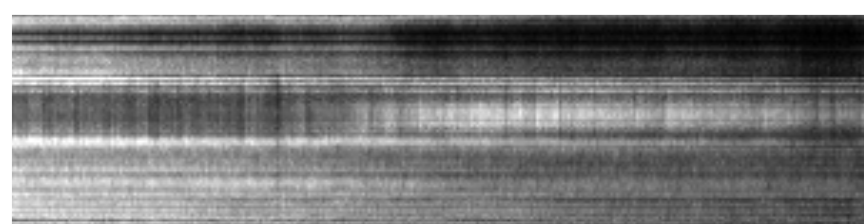

## B)

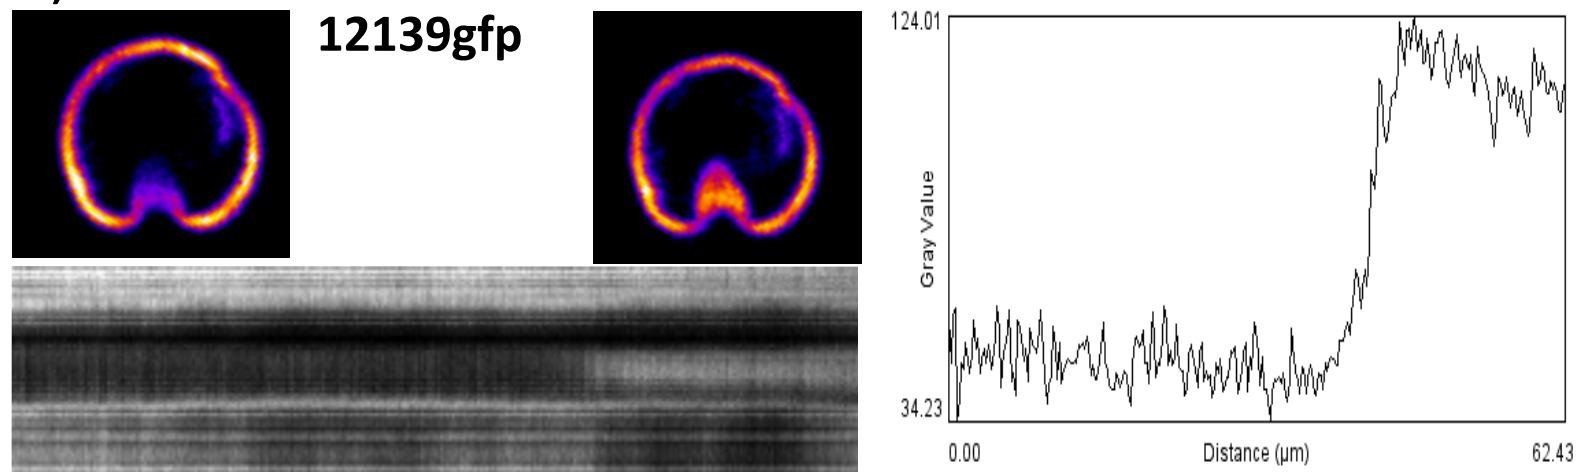

## C)

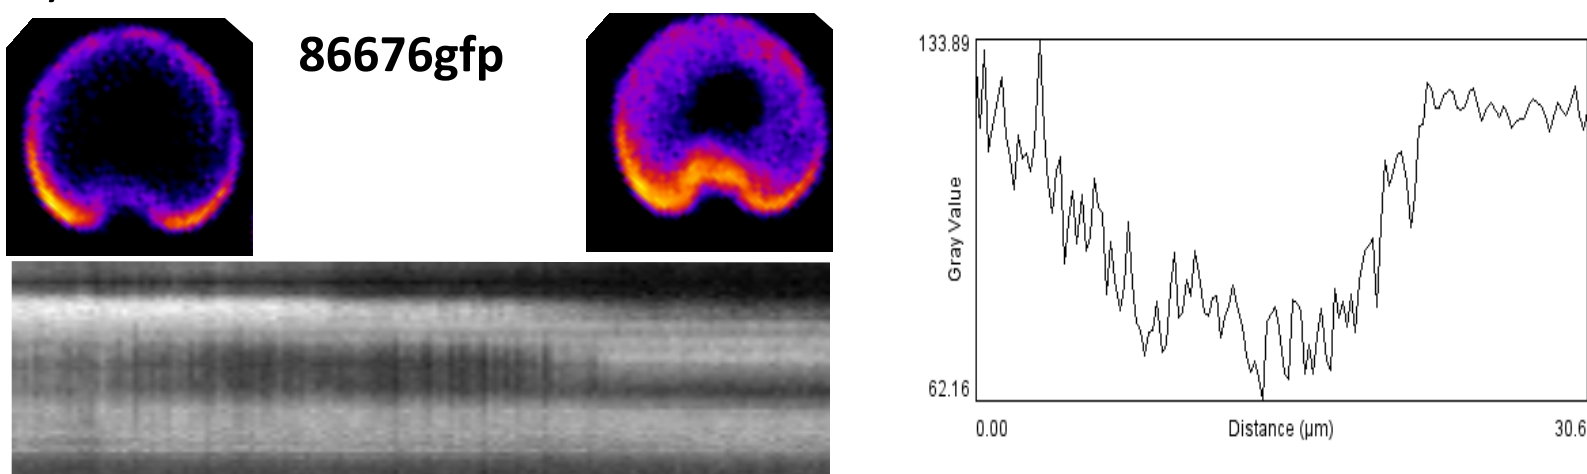



# Figure 5

A)

bioRxiv preprint doi: <https://doi.org/10.1101/213421>; this version posted November 3, 2017. The copyright holder for this preprint (which was not certified by peer review) is the author/funder. All rights reserved. No reuse allowed without permission.

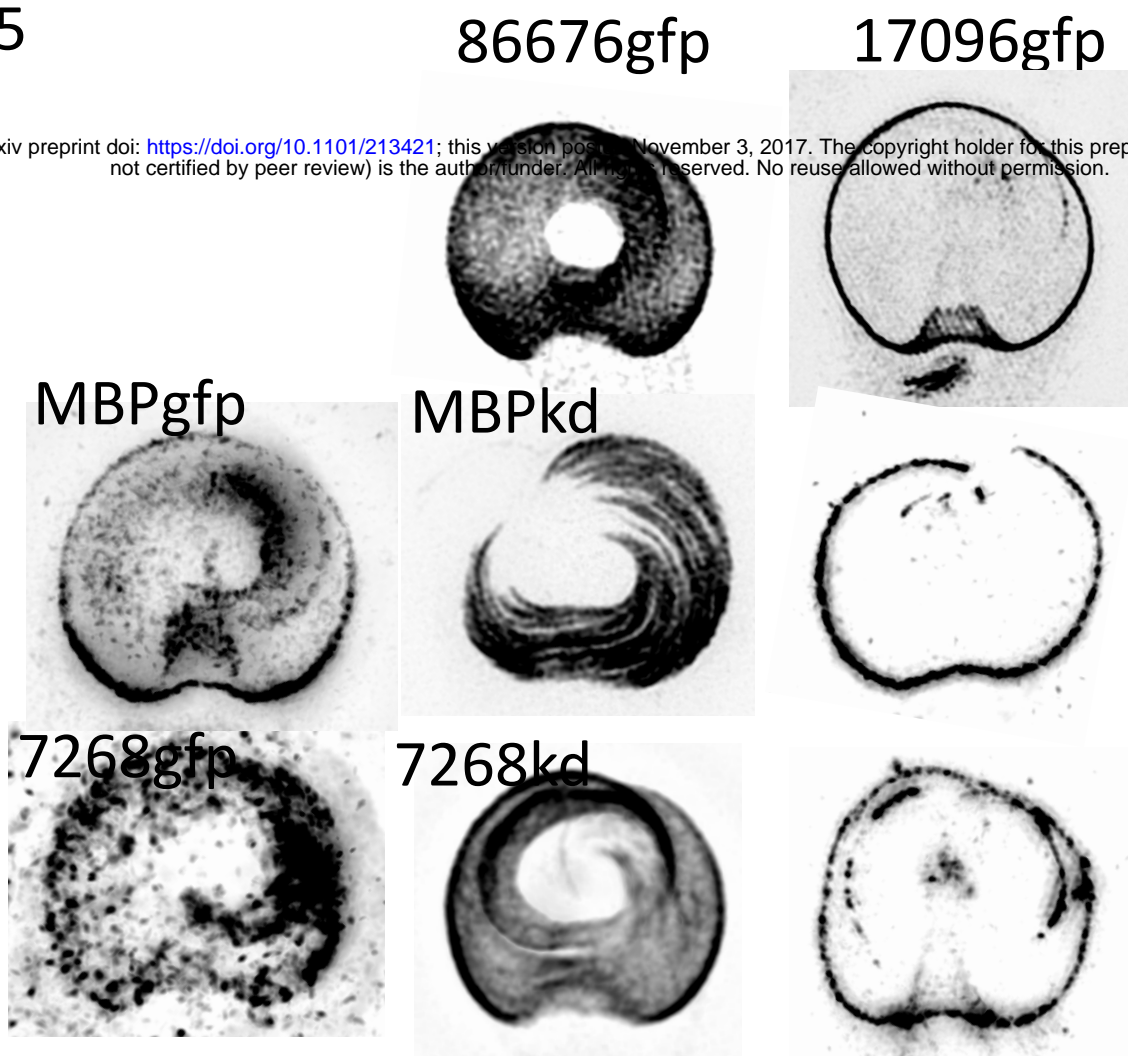

B)

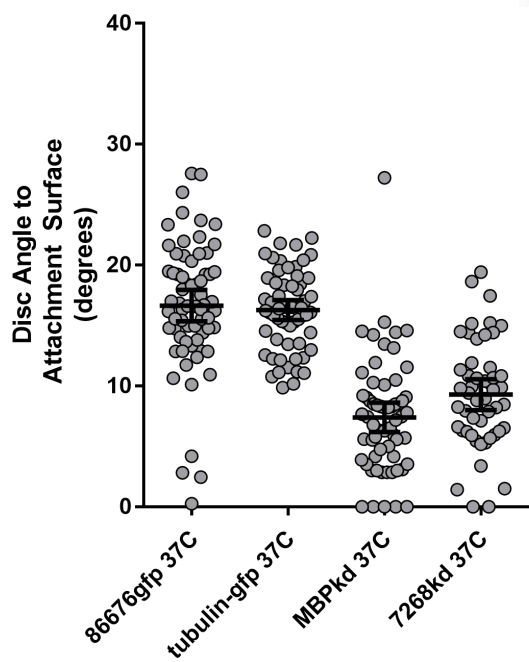

C)

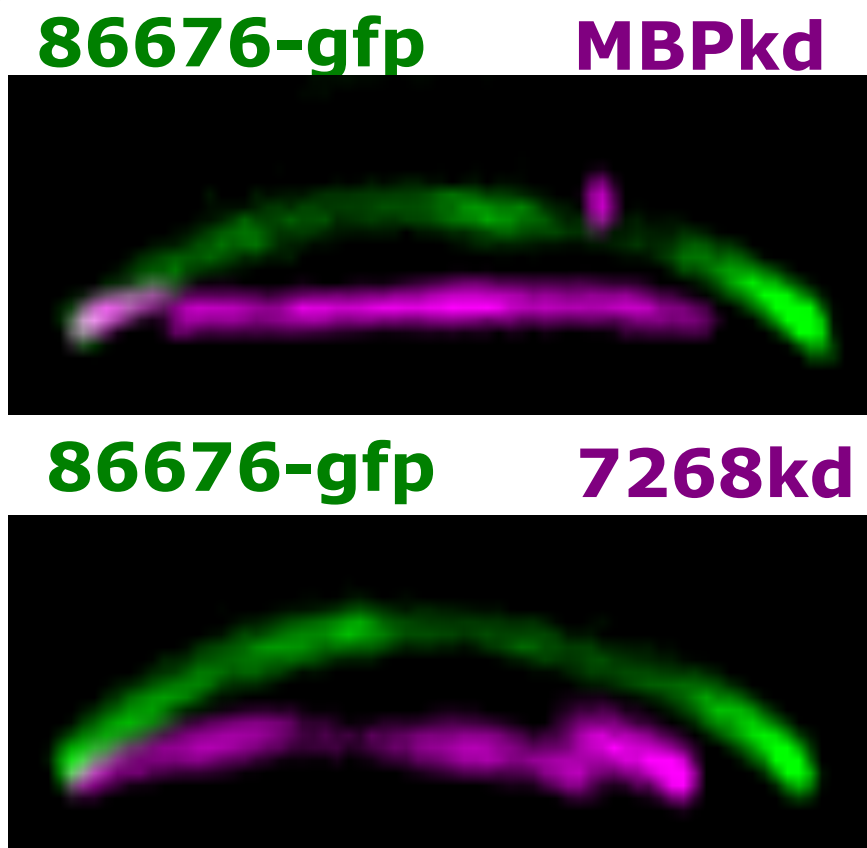

D)

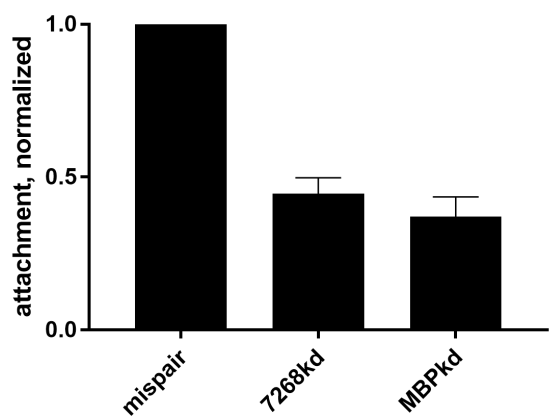

# Figure 6

A)

bioRxiv preprint doi: <https://doi.org/10.1101/213421>; this version posted November 3, 2017. The copyright holder for this preprint (which was not certified by peer review) is the author/funder. All rights reserved. No reuse allowed without permission.

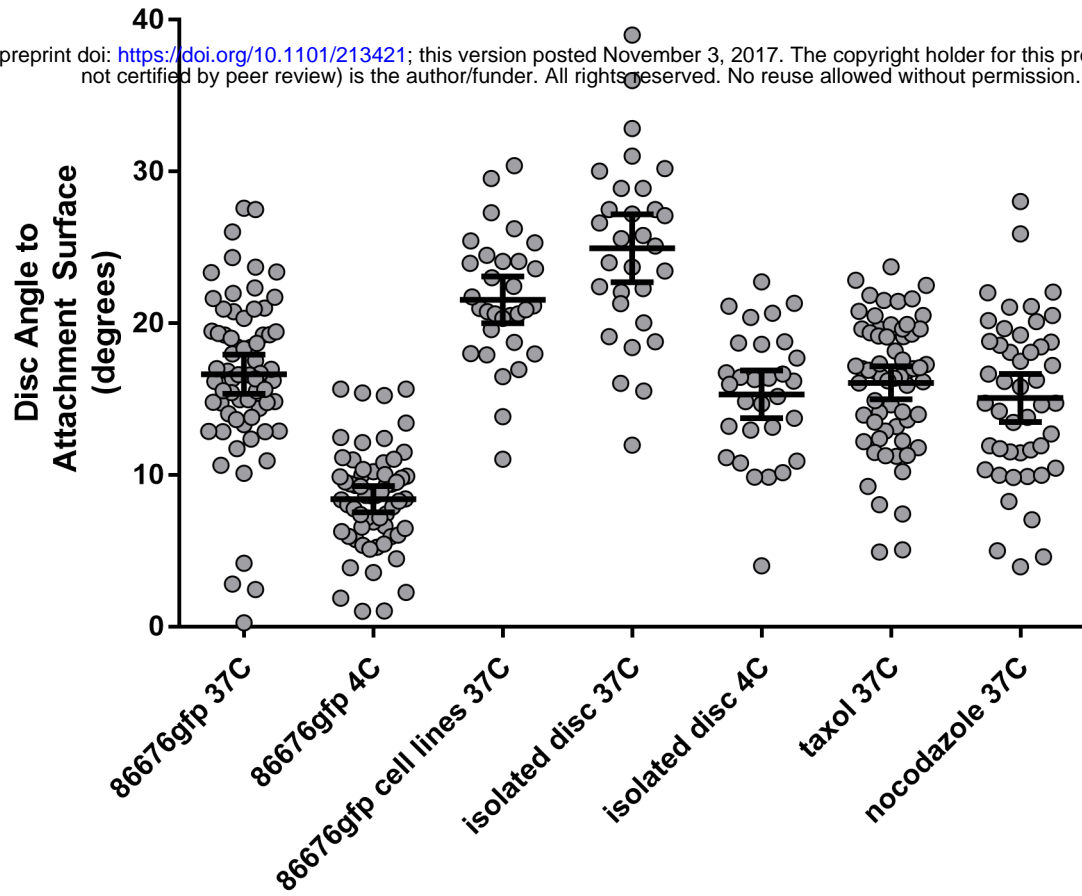

B)

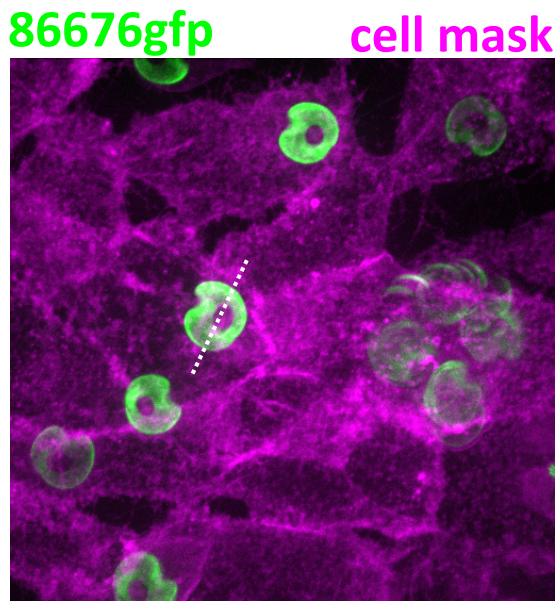

C)

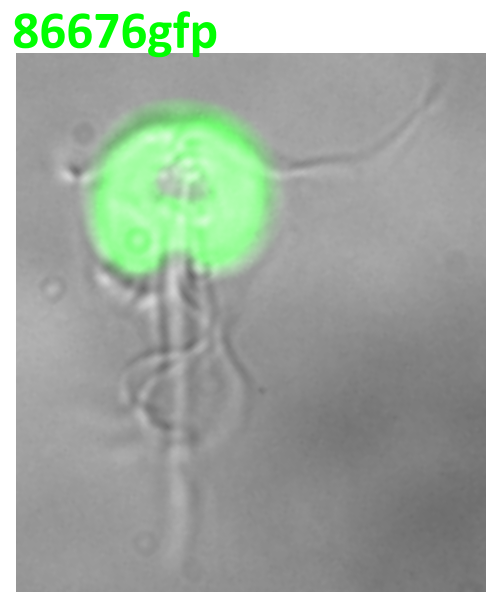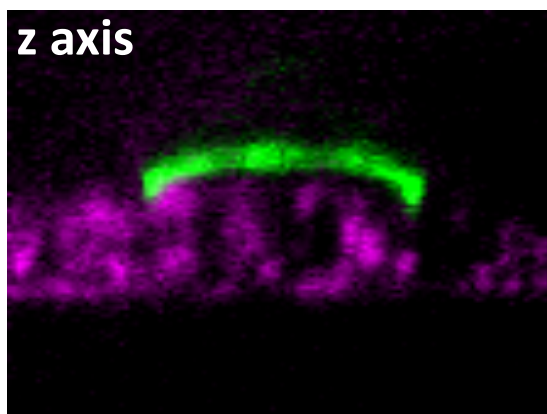

# FLAT

# DOMED

# SEALED

bioRxiv preprint doi: <https://doi.org/10.1101/213425>; this version posted November 3, 2017. The copyright holder for this preprint (which was not certified by peer review) is the author/funder. All rights reserved. No reuse allowed without permission.

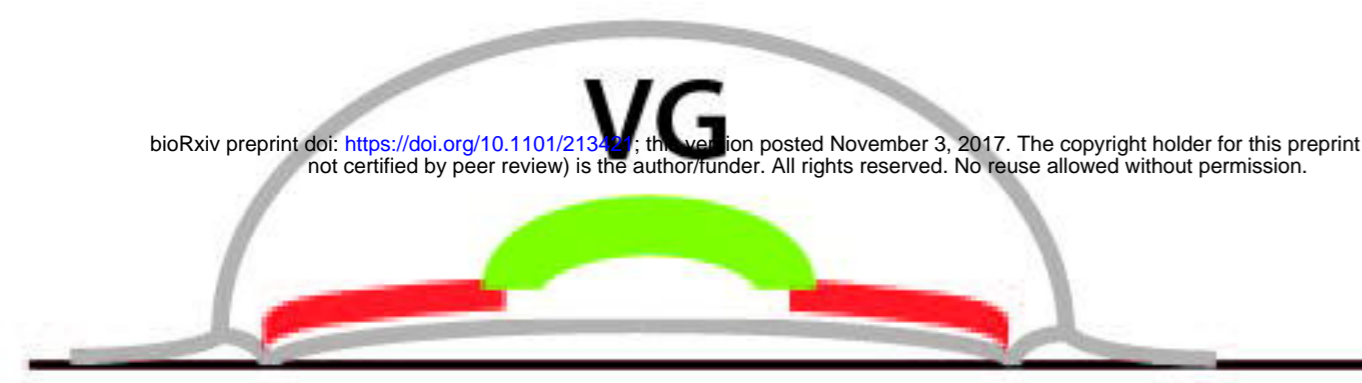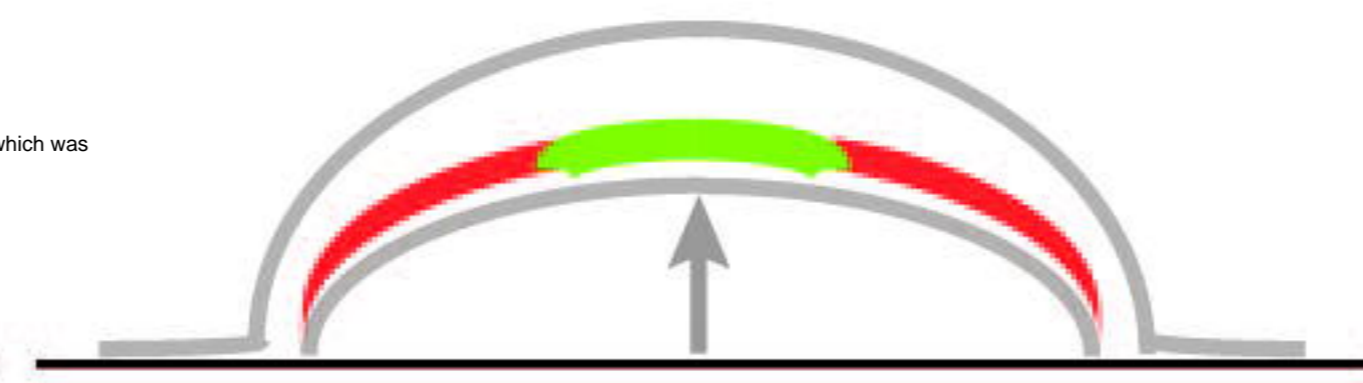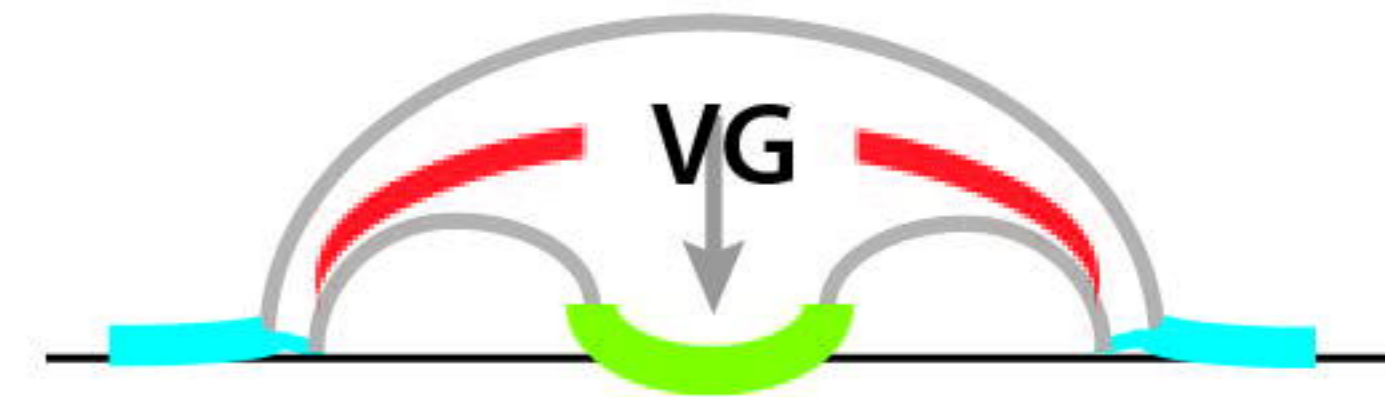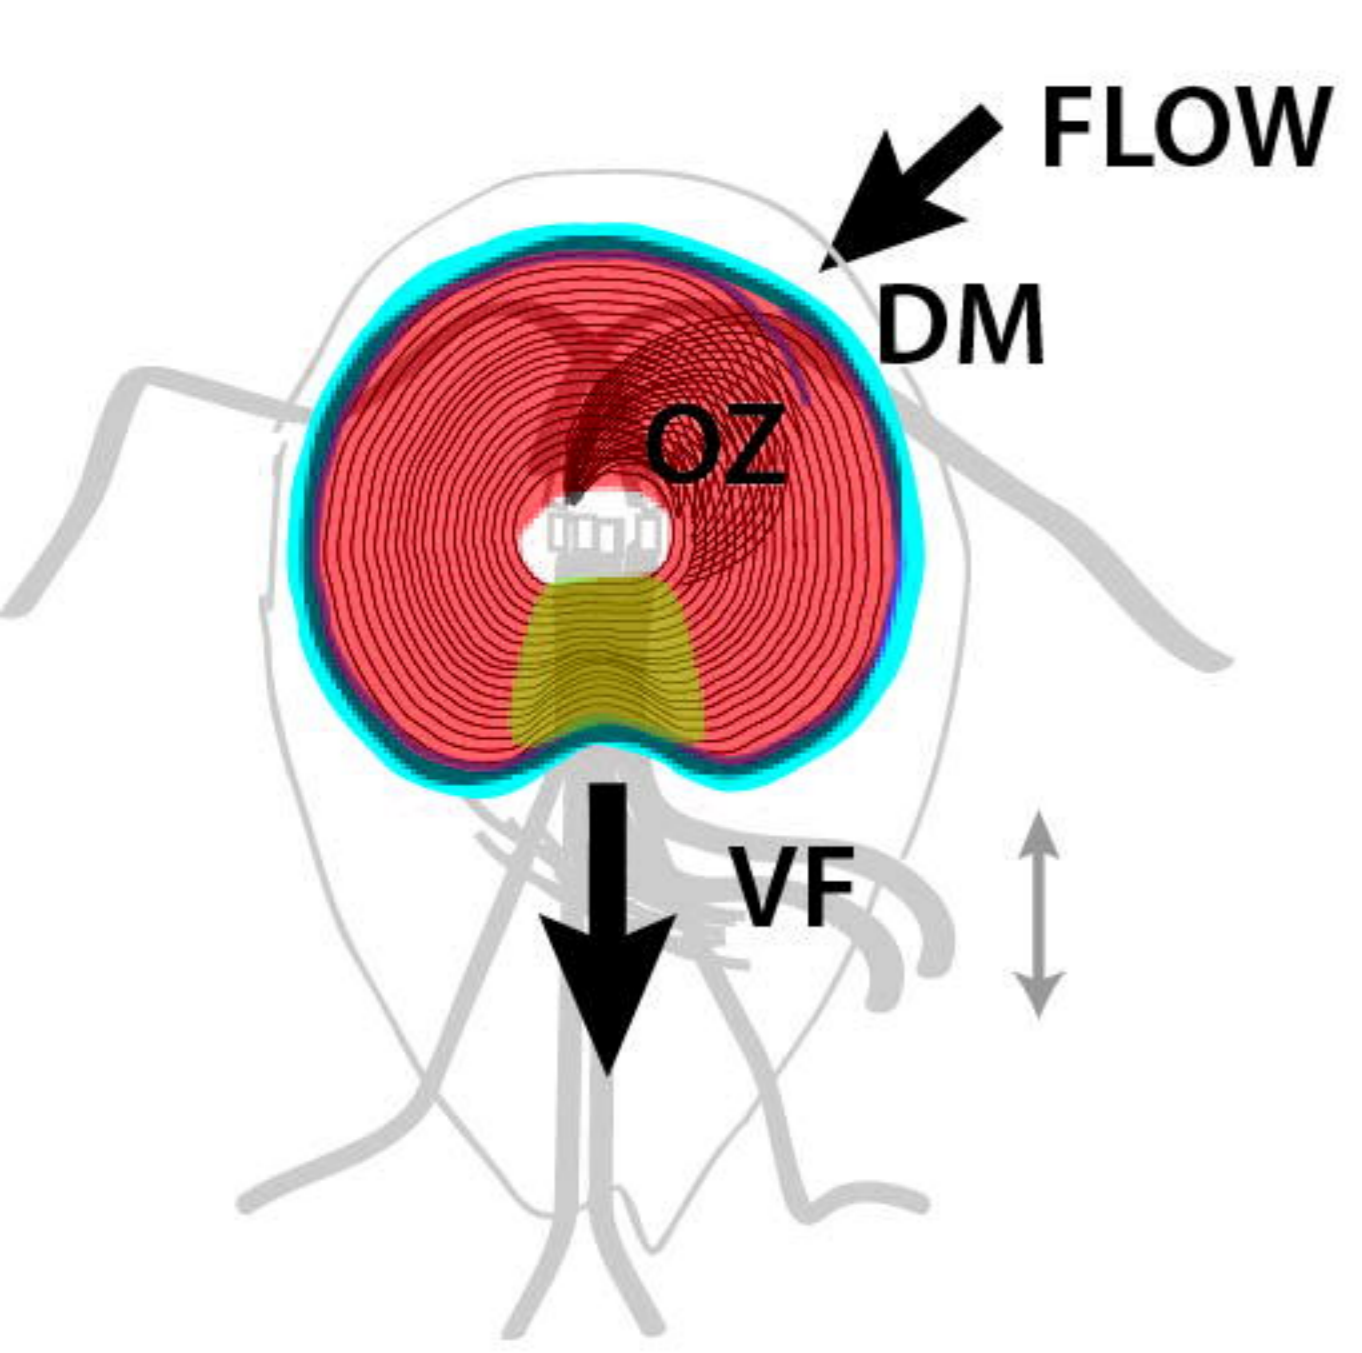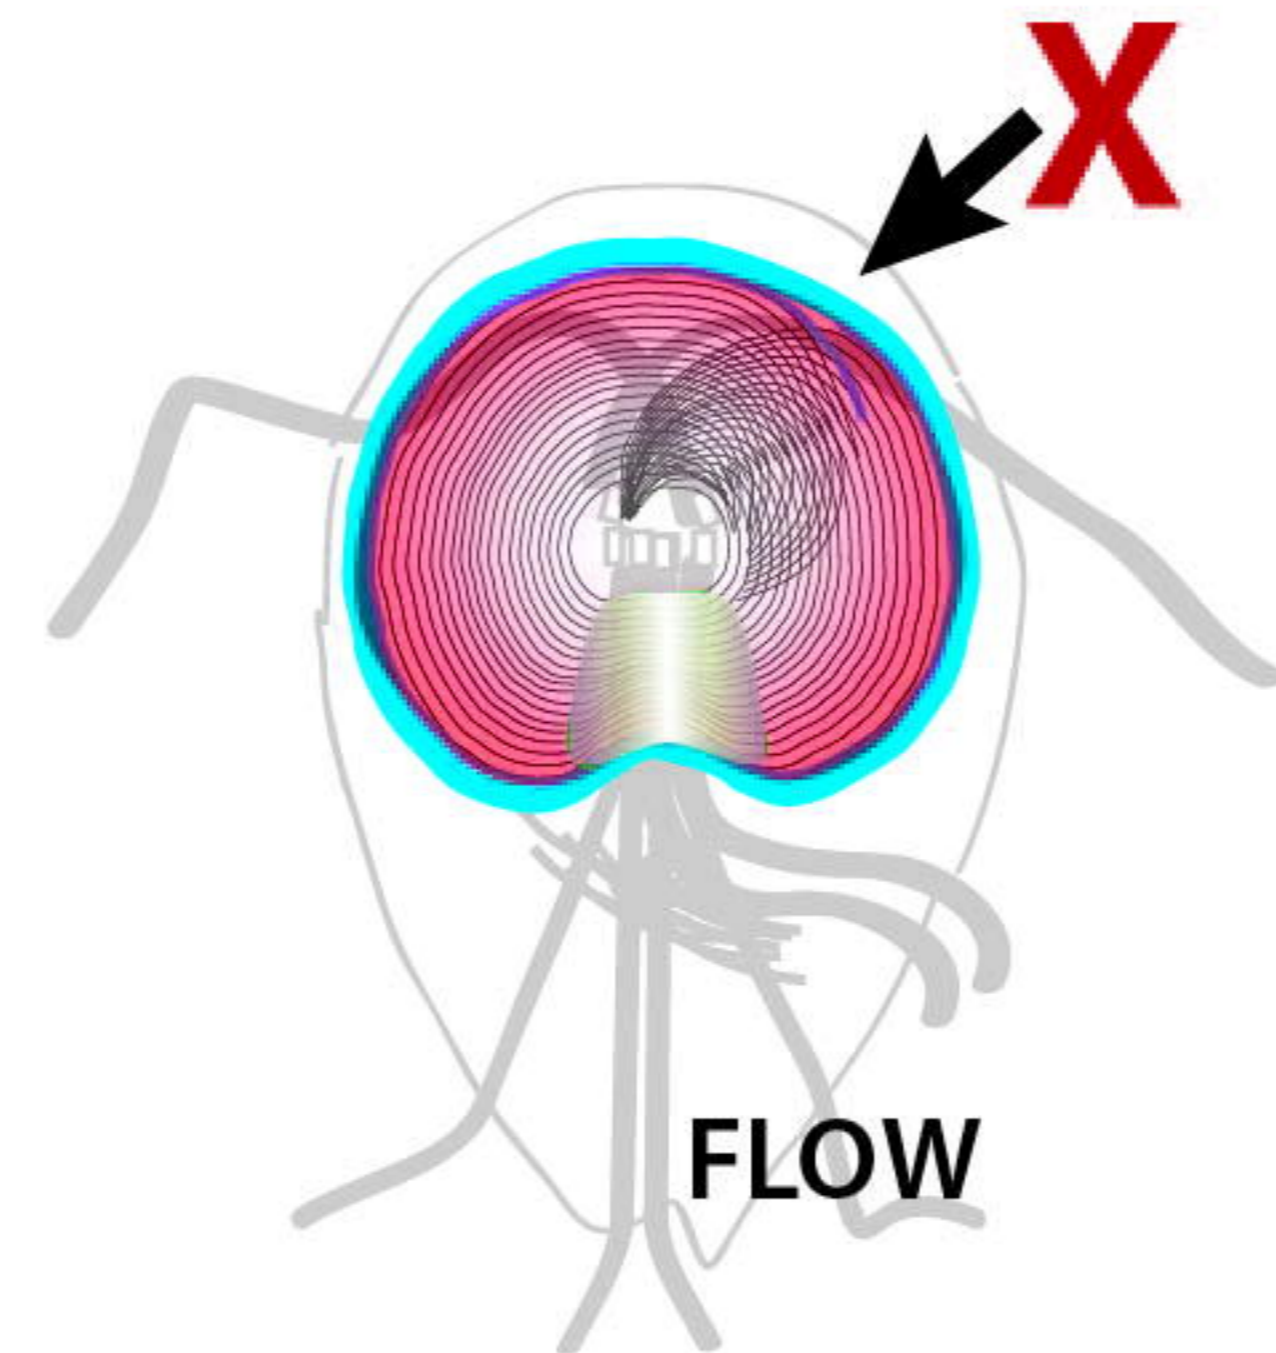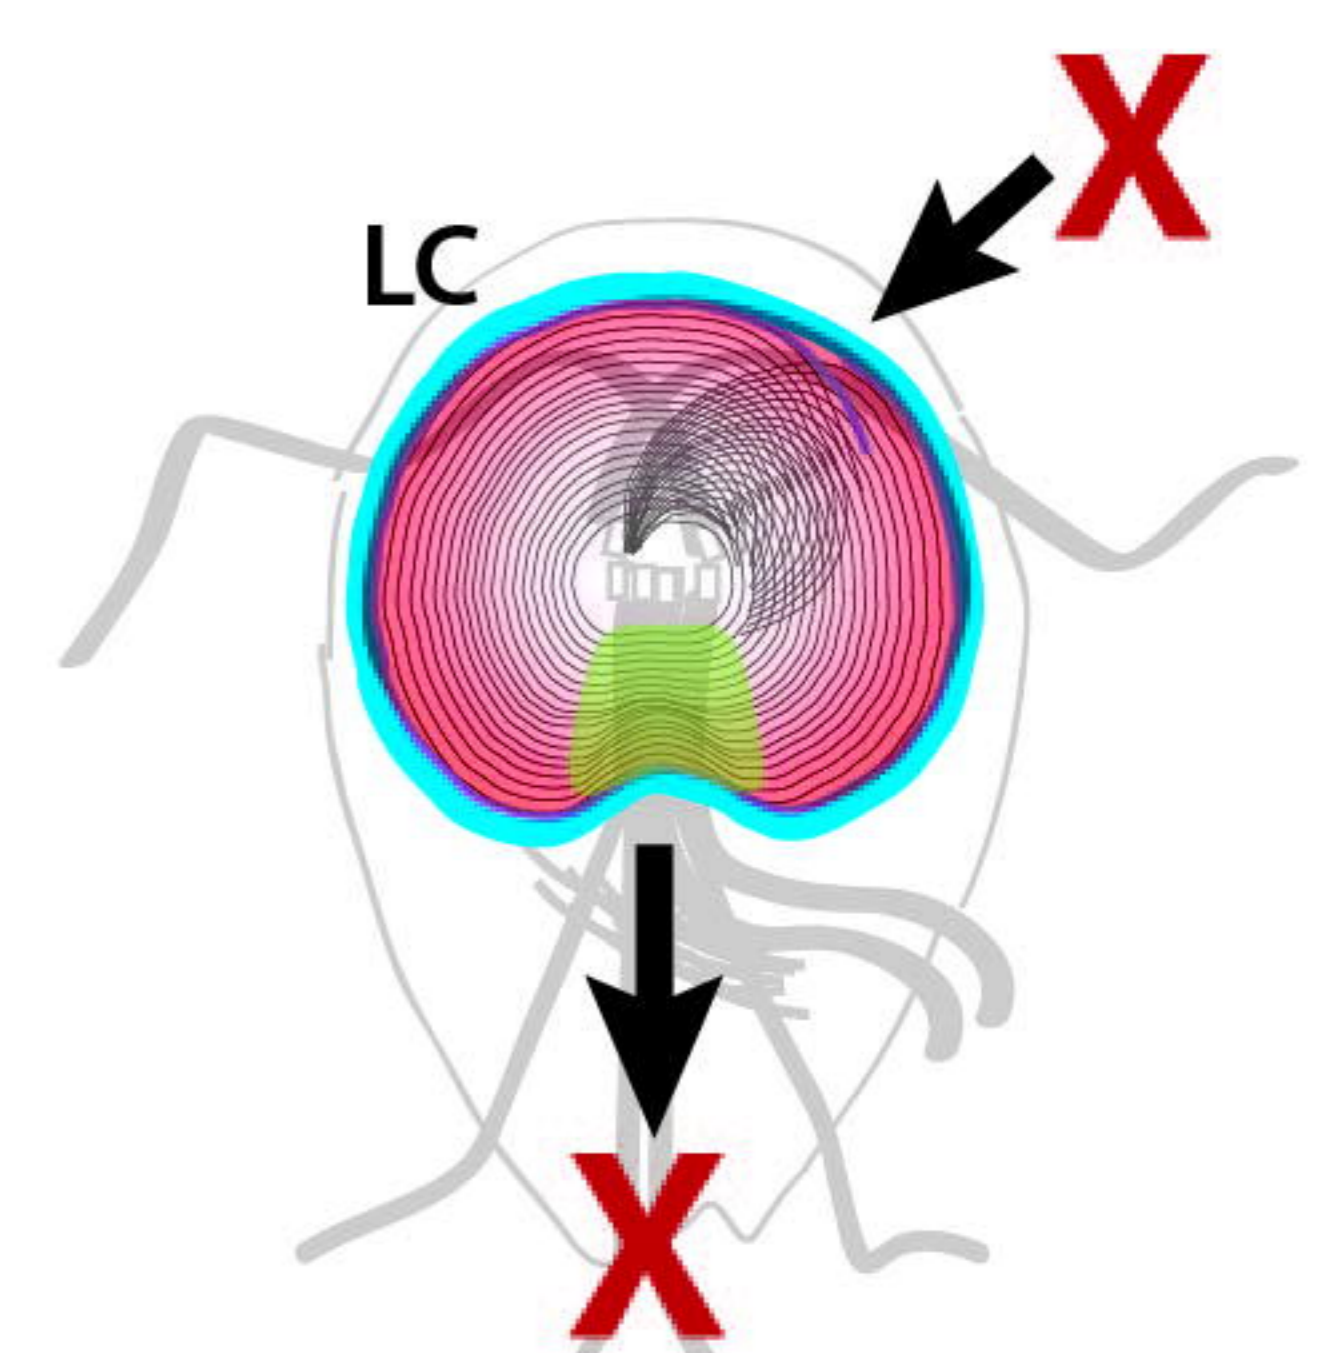

Source: https://www.biorxiv.org/content/10.1101/213421v1.full.pdf
